# Supplementary material for: Quantitative Mass Spectrometry Analysis of PD-L1 Protein Expression, N-glycosylation and Expression Stoichiometry with PD-1 and PD-L2 in Human Melanoma
Source: PubMed Central journal article supplement (PMC5629259; doi:10.1074/mcp.ra117.000037), 2017-05-25
Supplement: supp_RA117.000037_4581_1_supp_1260_pq7ppf.pdf [file supp_RA117.000037_4581_1_supp_1260_pq7ppf.pdf]

Morales-Betanzos et al. Supplemental Dataset 1

H&E and IHC micrographs for melanoma sections

Each page shows H&E (top) an IHC (bottom) stained for PD-L1 (red) and SOX10 (brown) at 20x magnification.

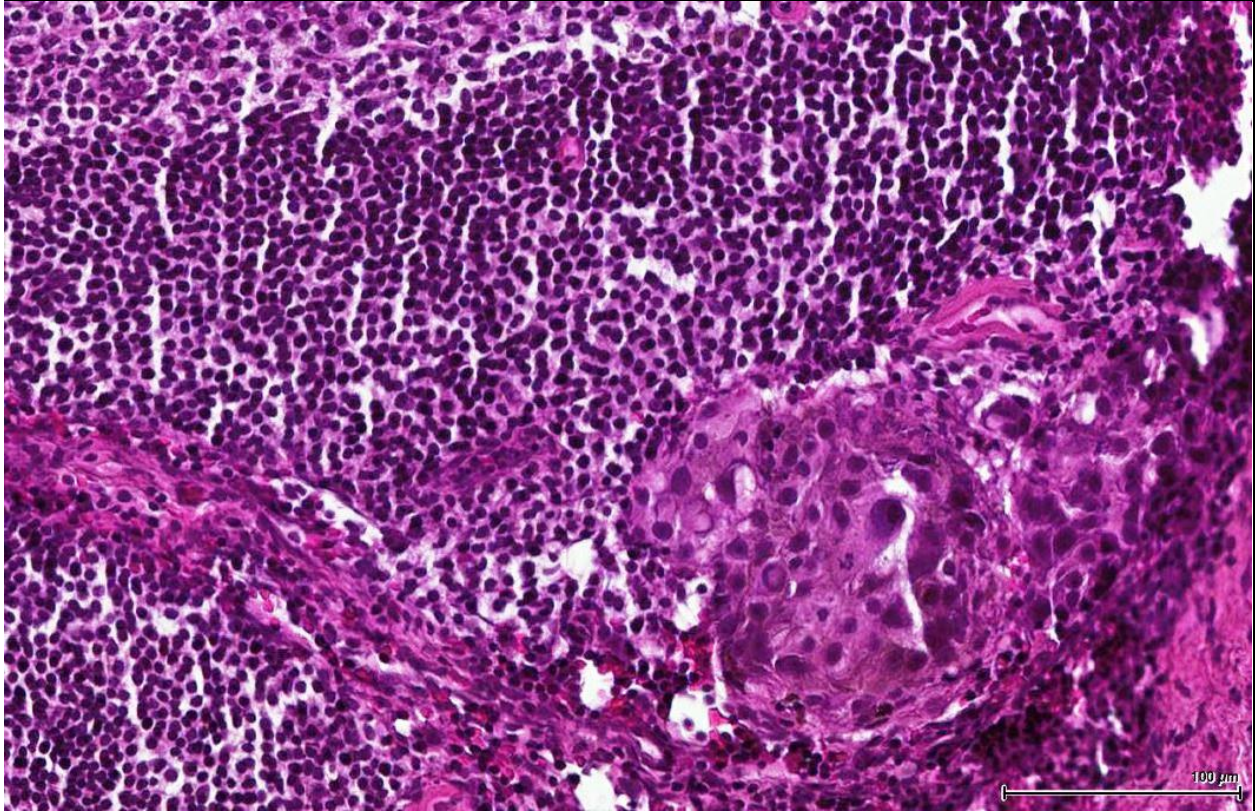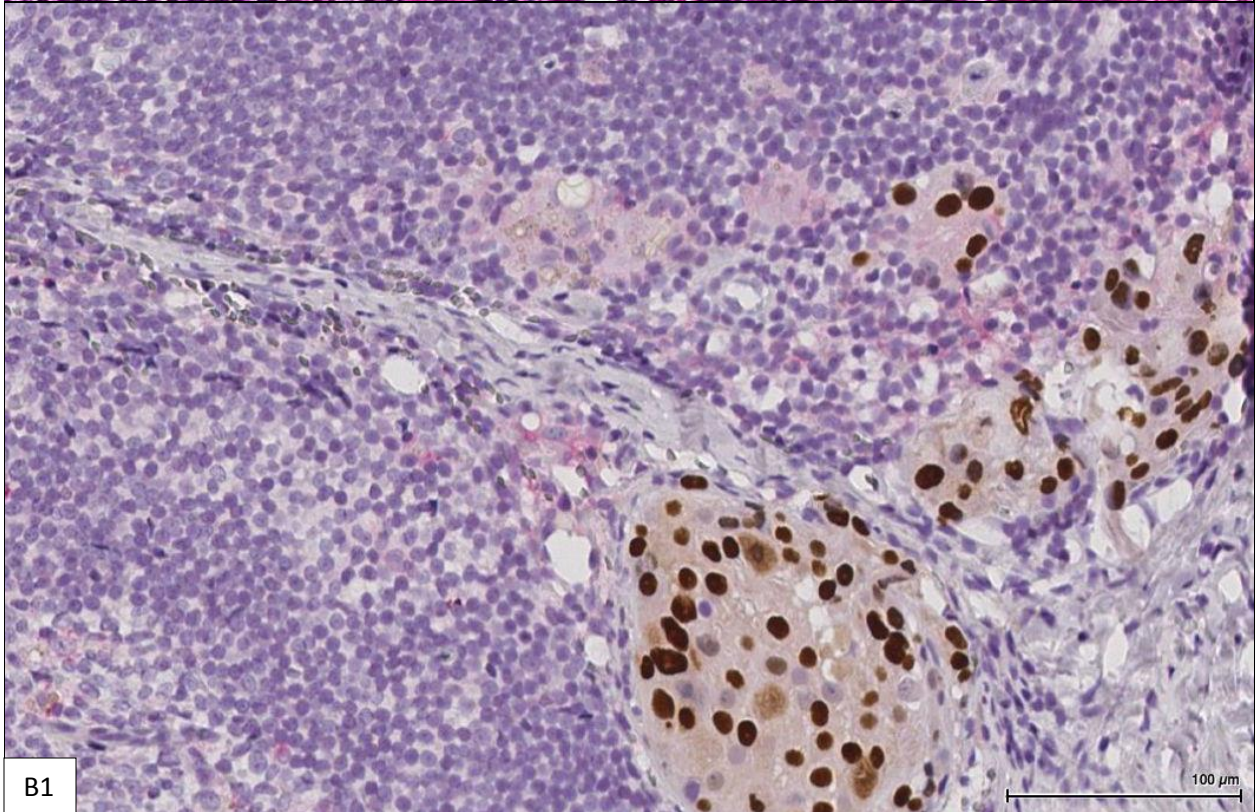



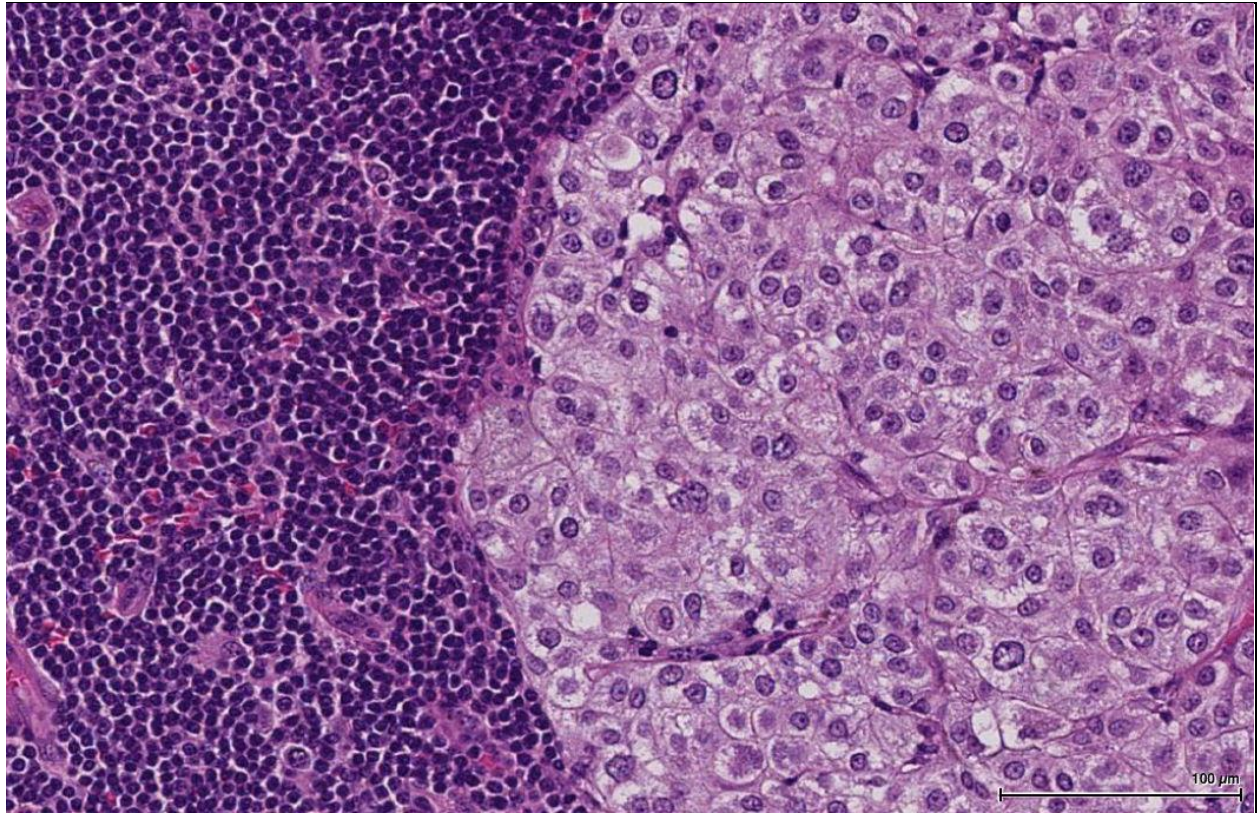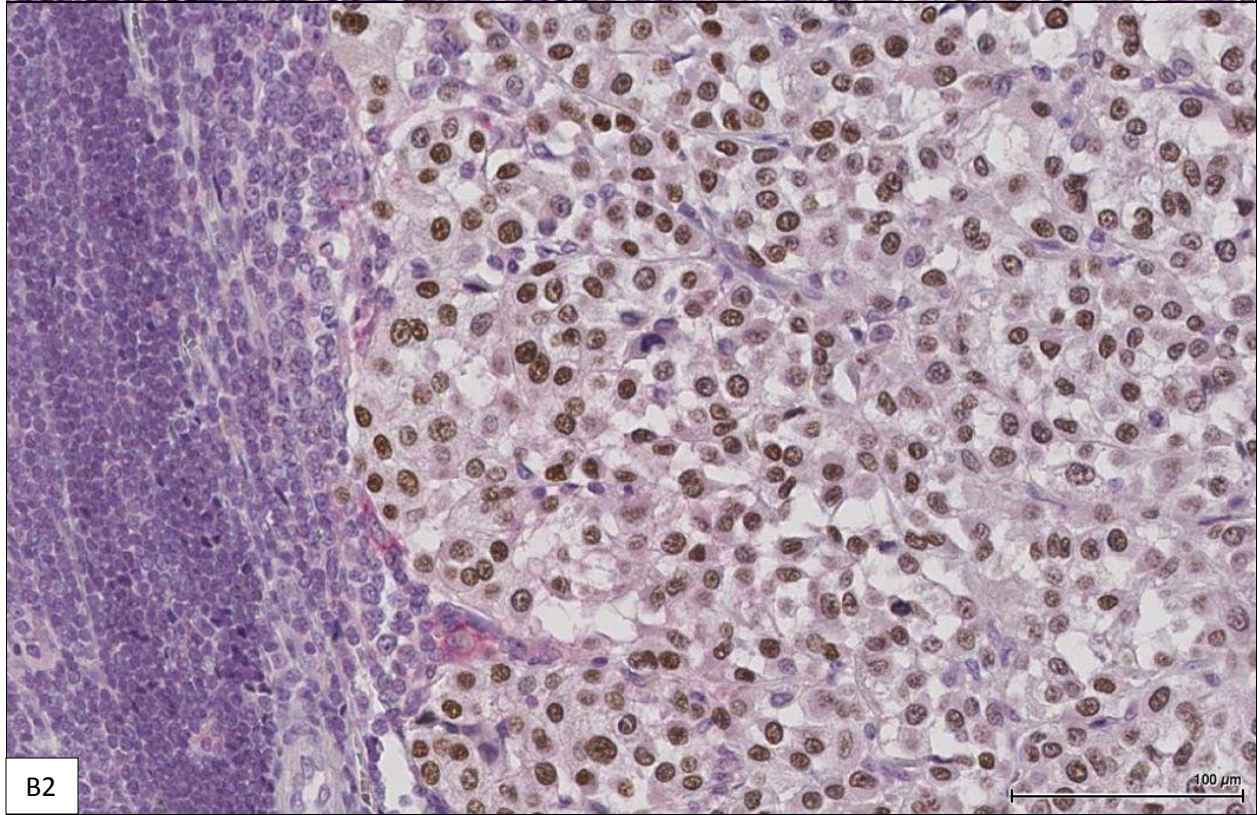

B2



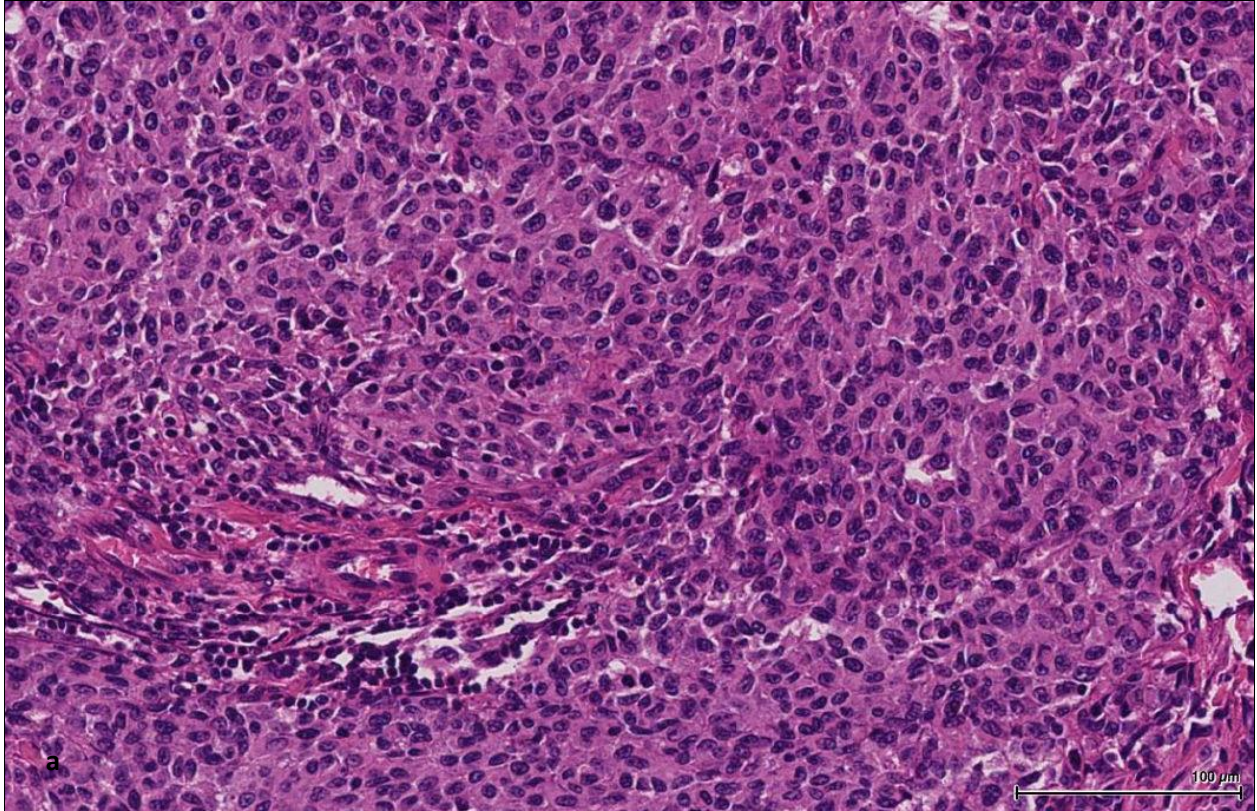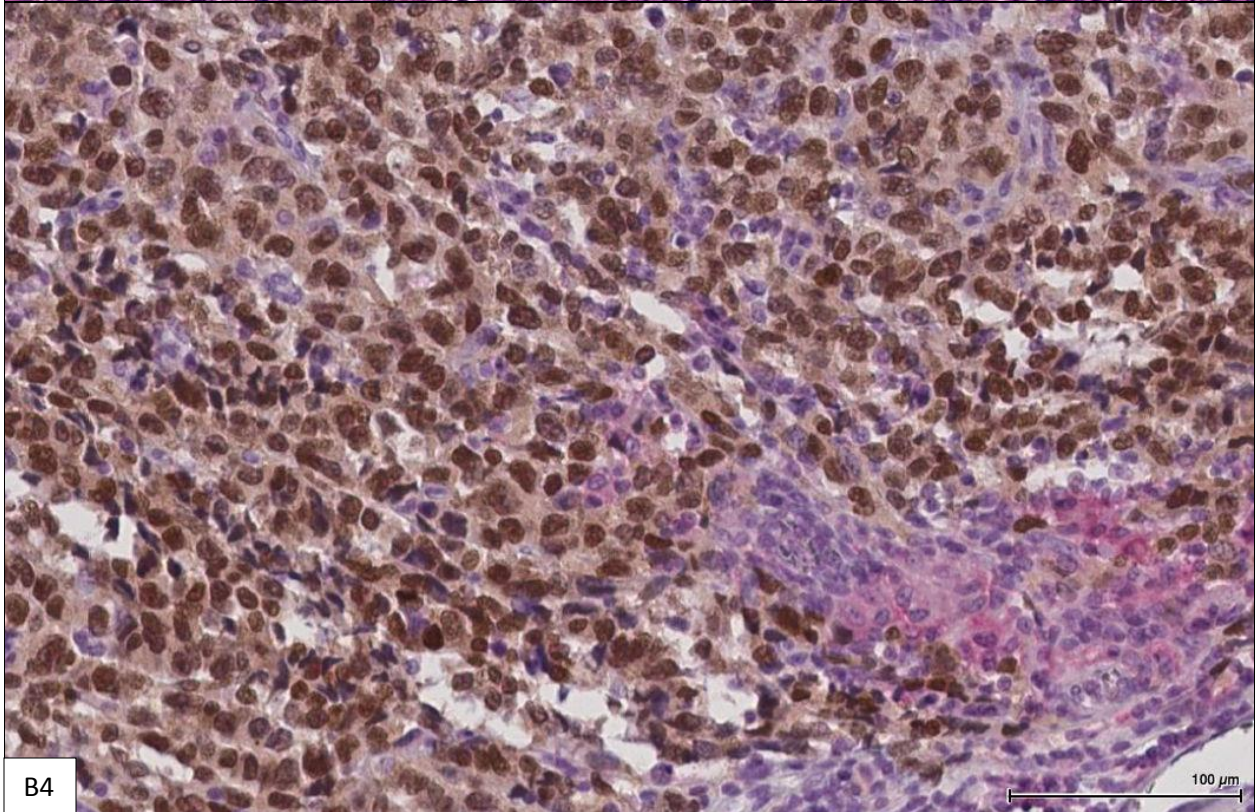



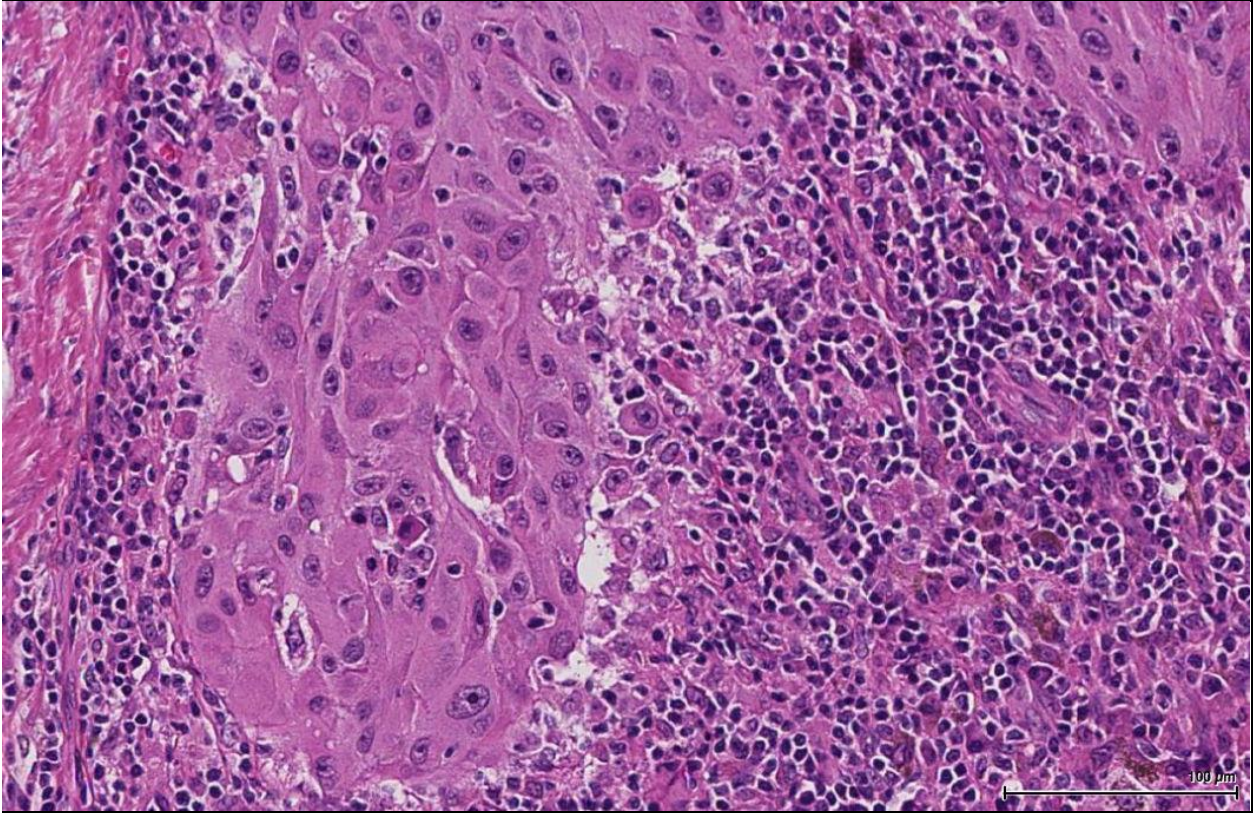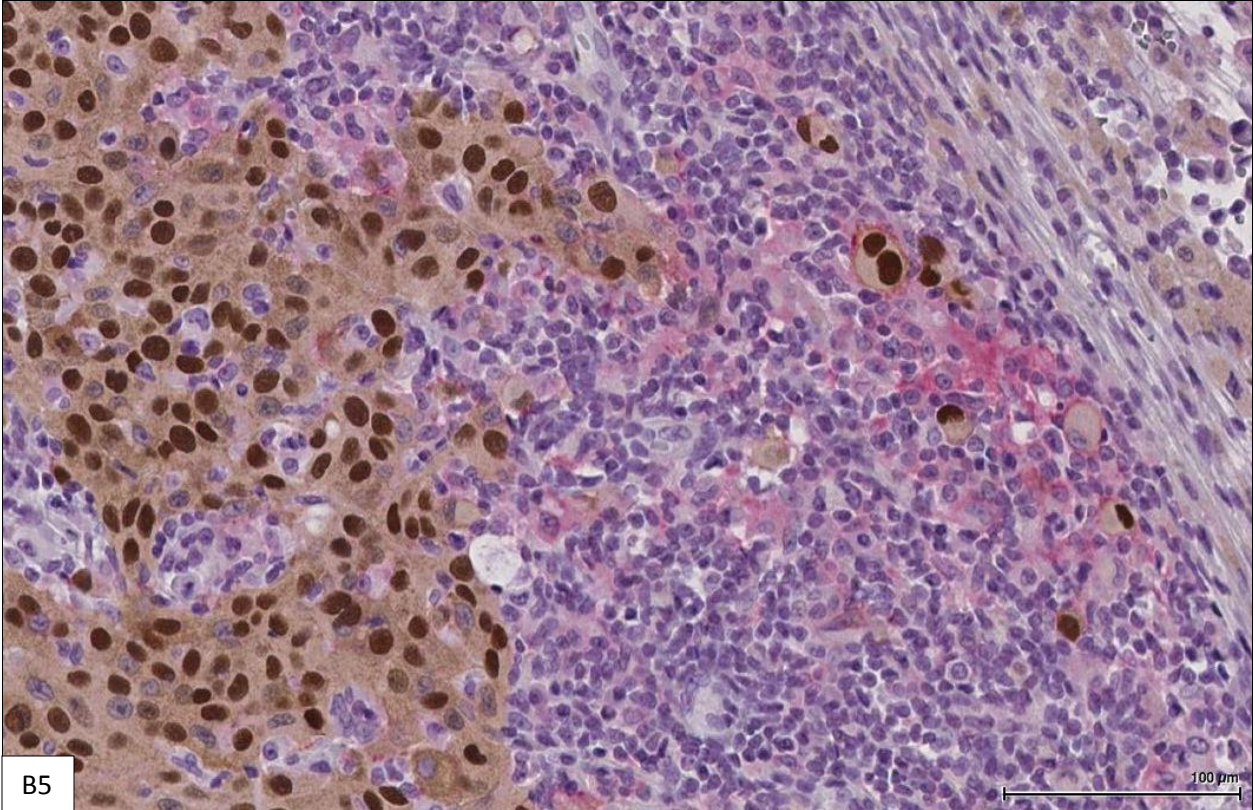

B5



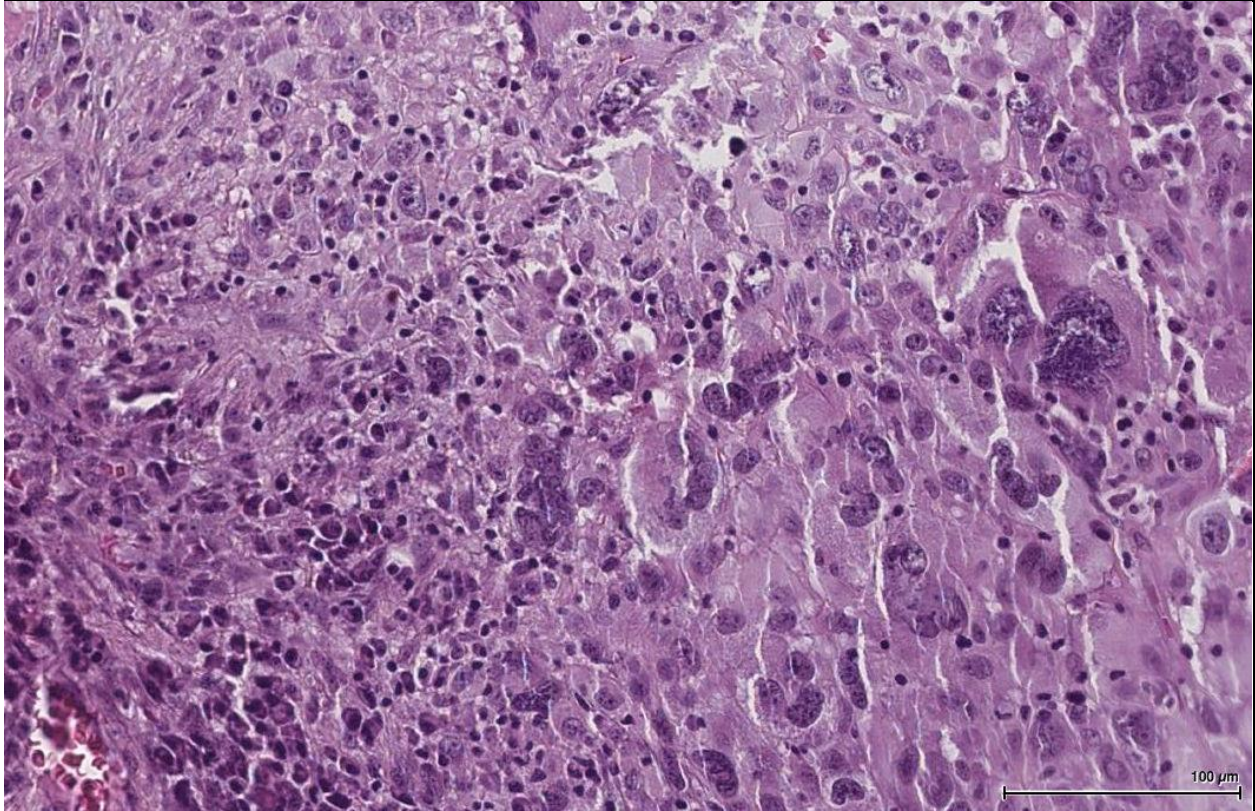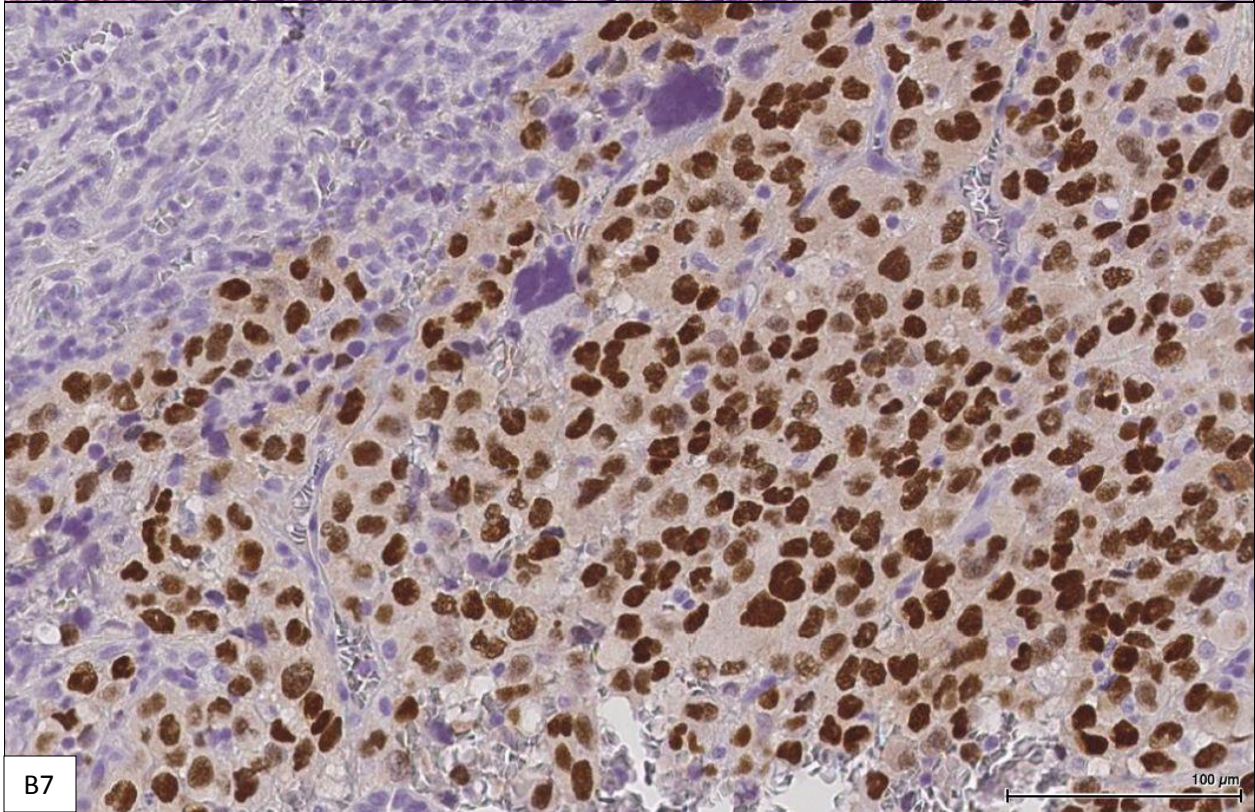

B7



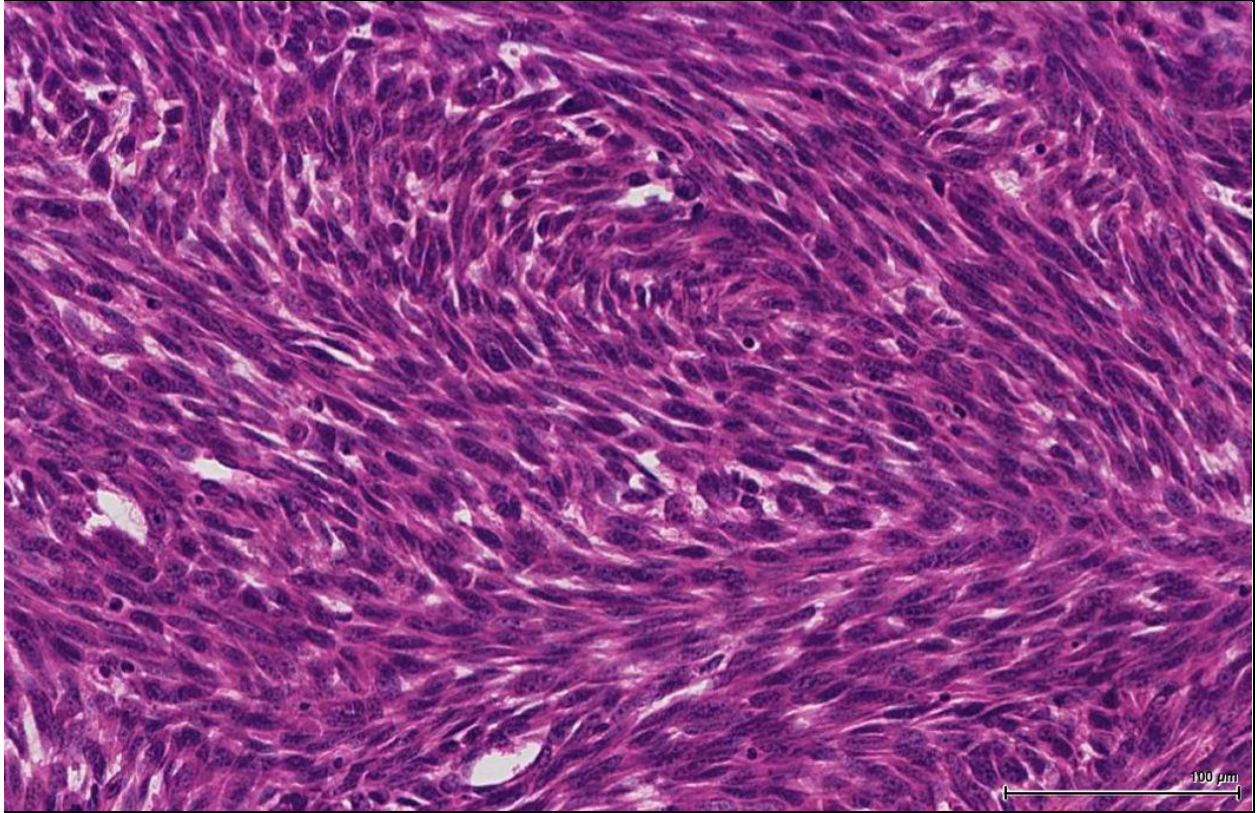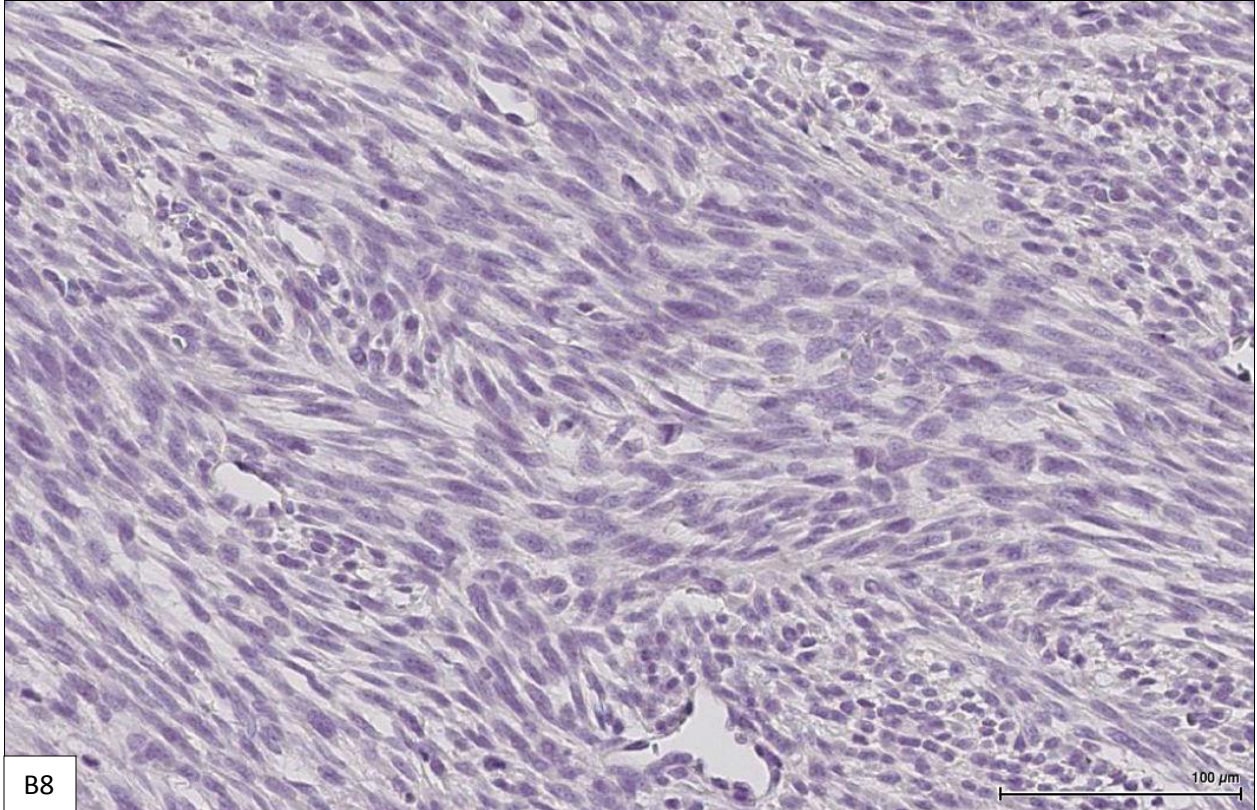

B8



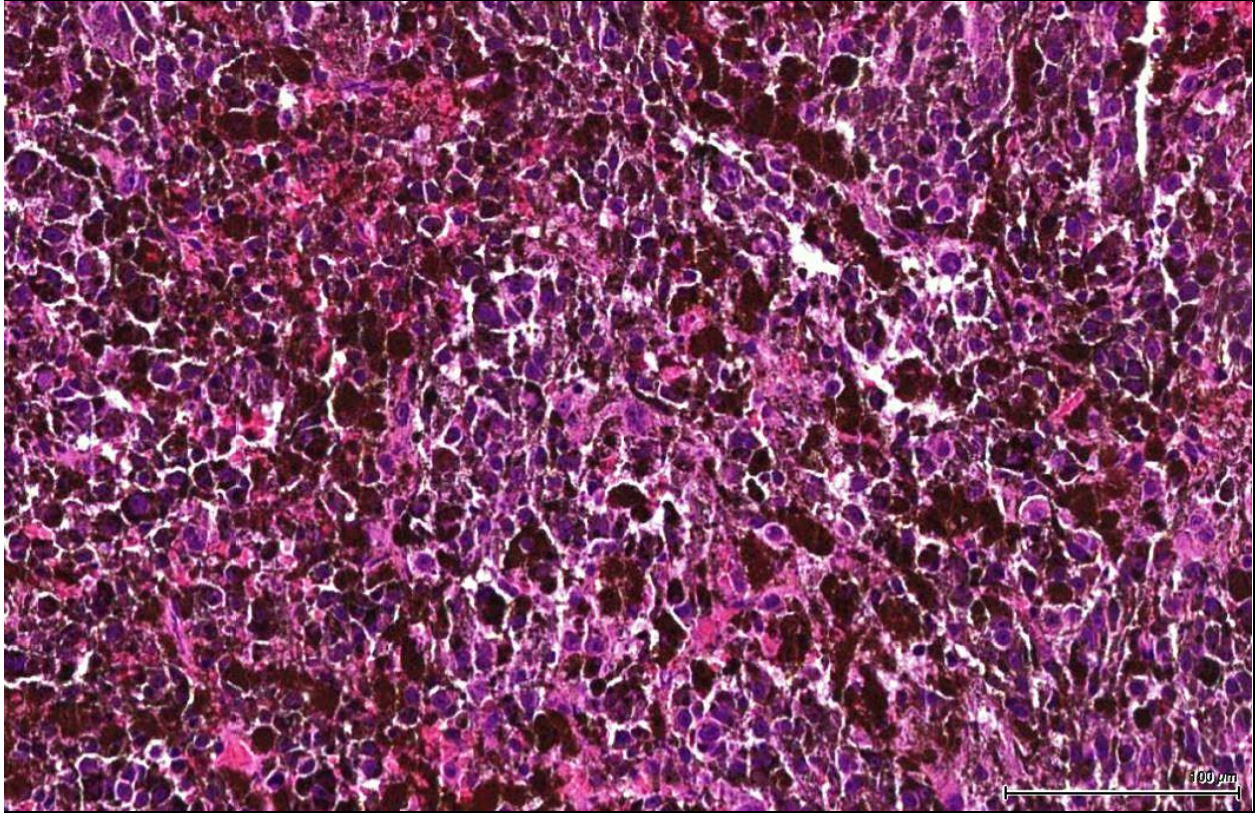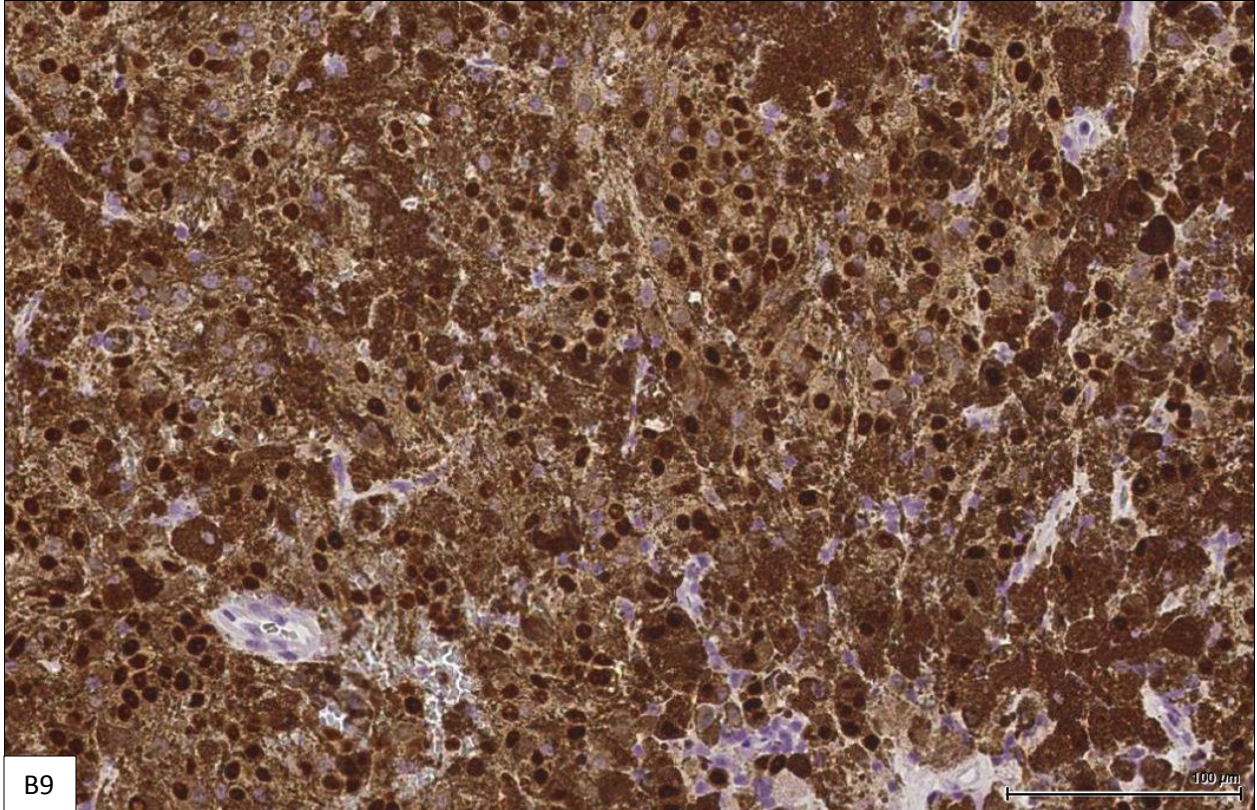

B9



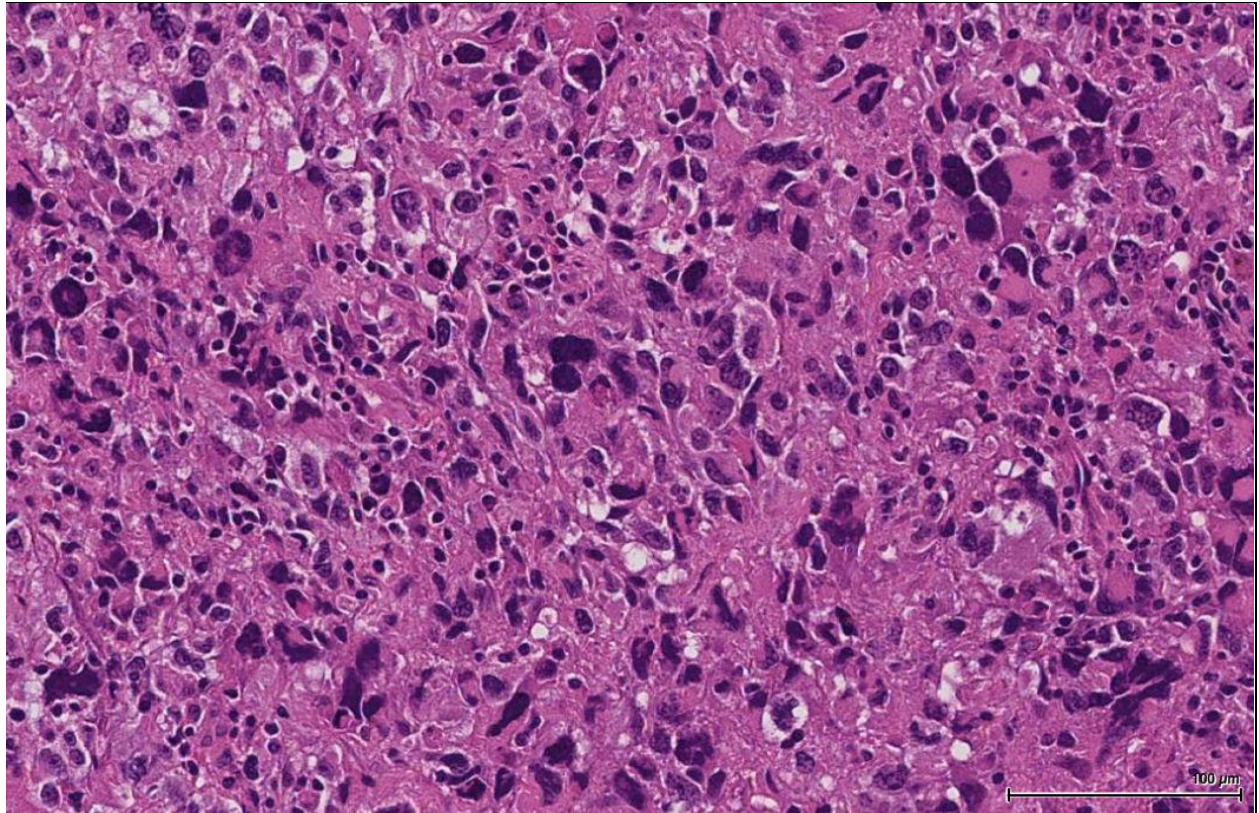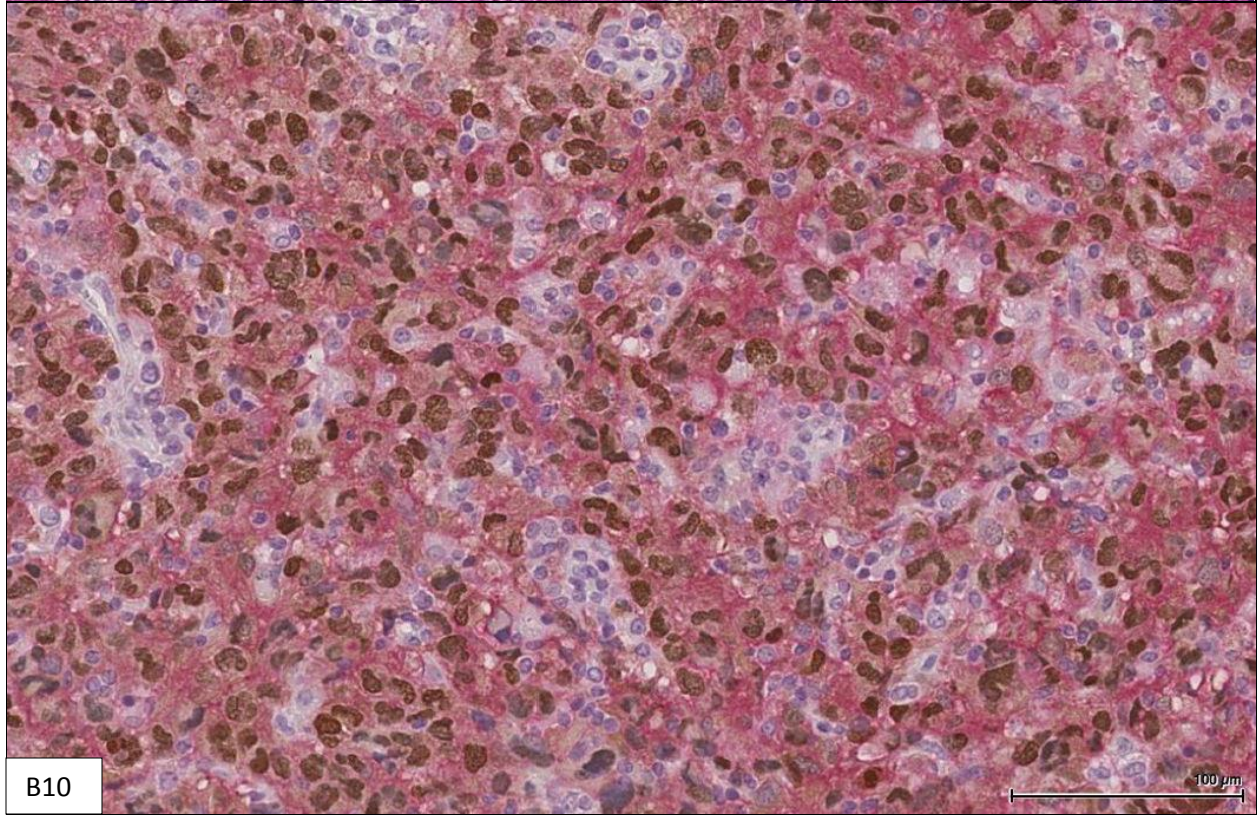

B10



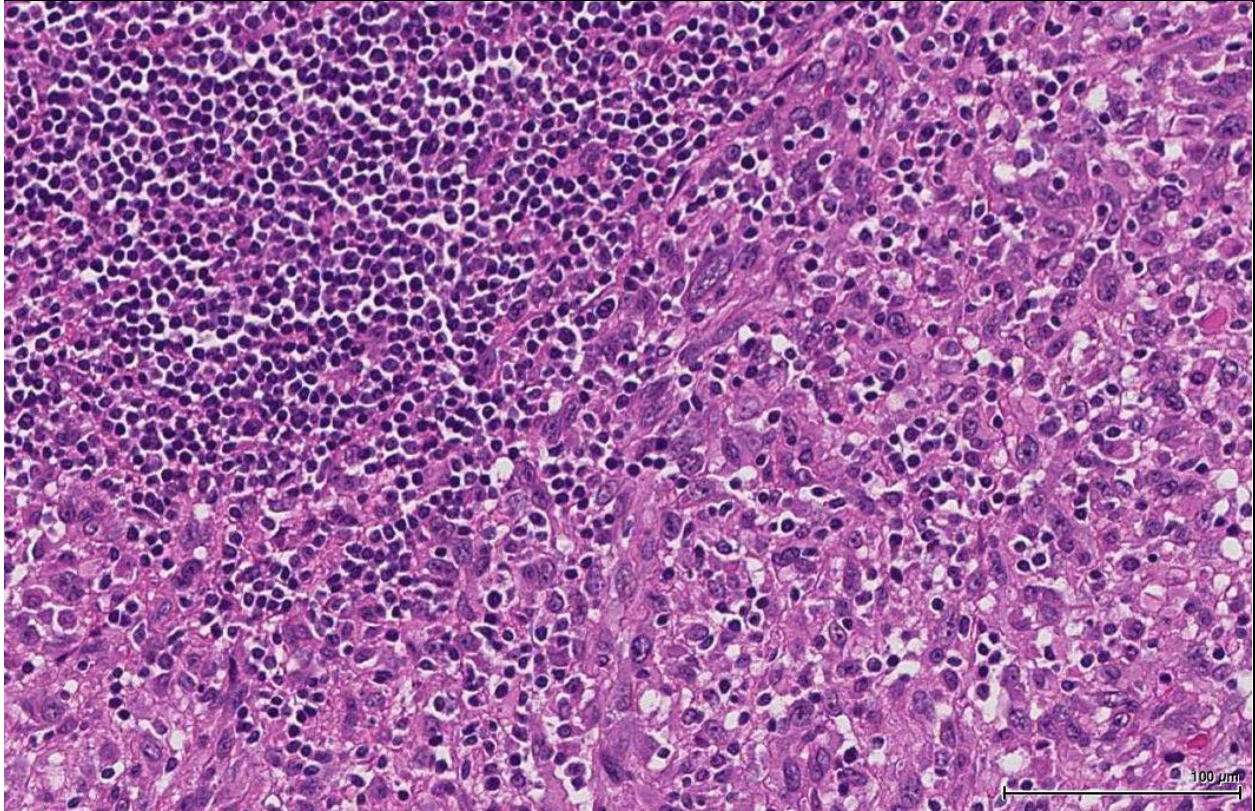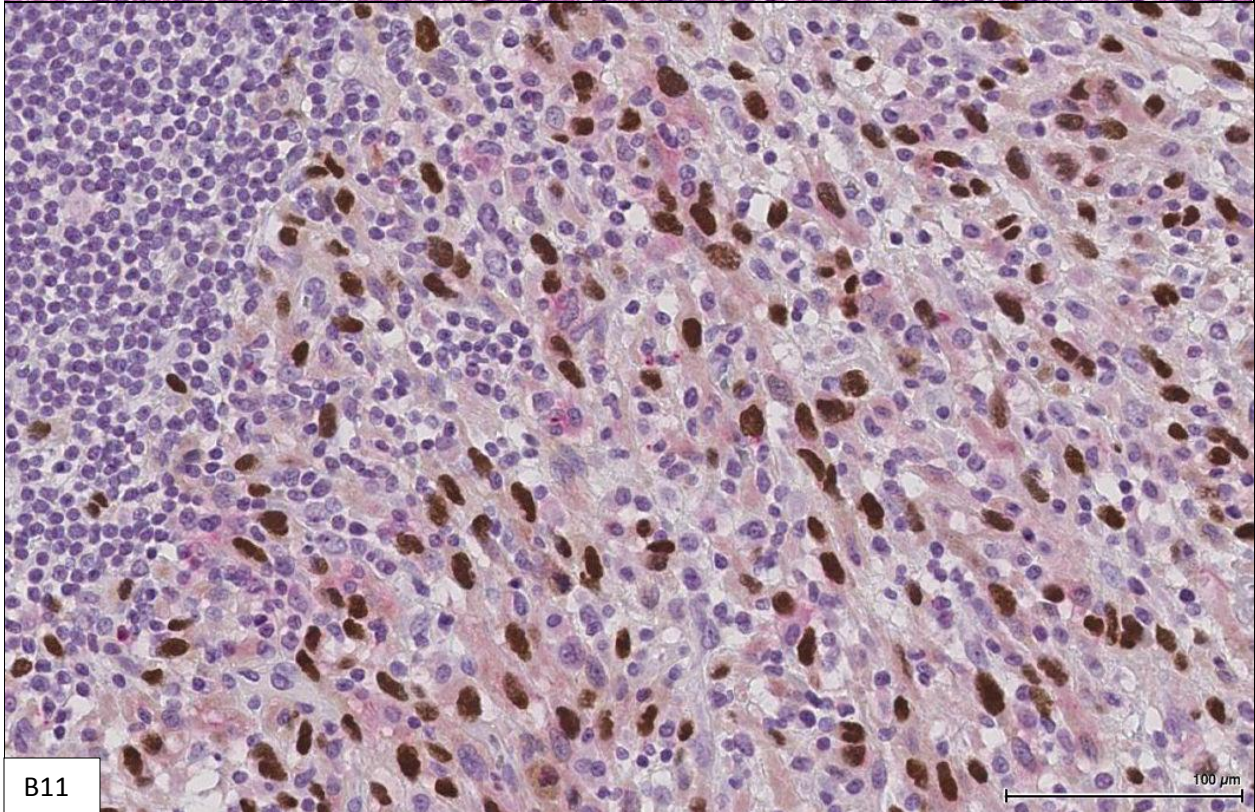

B11



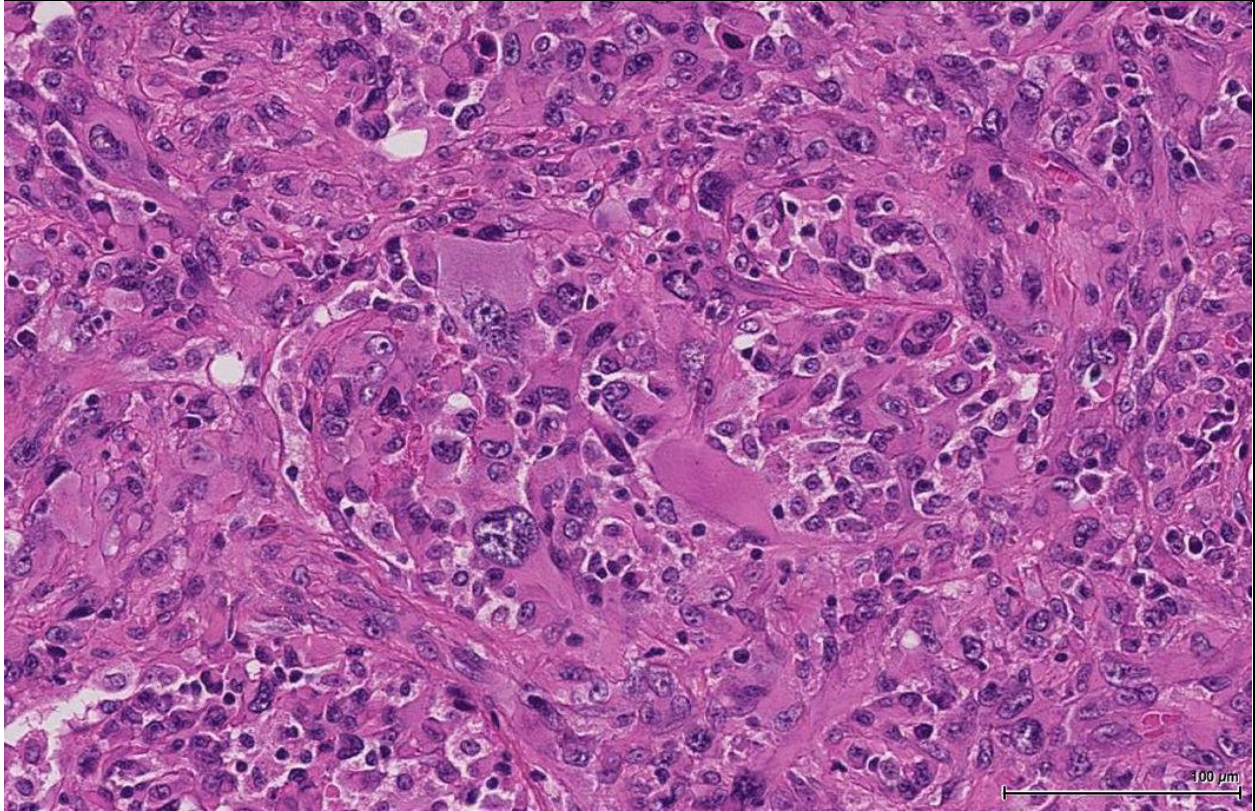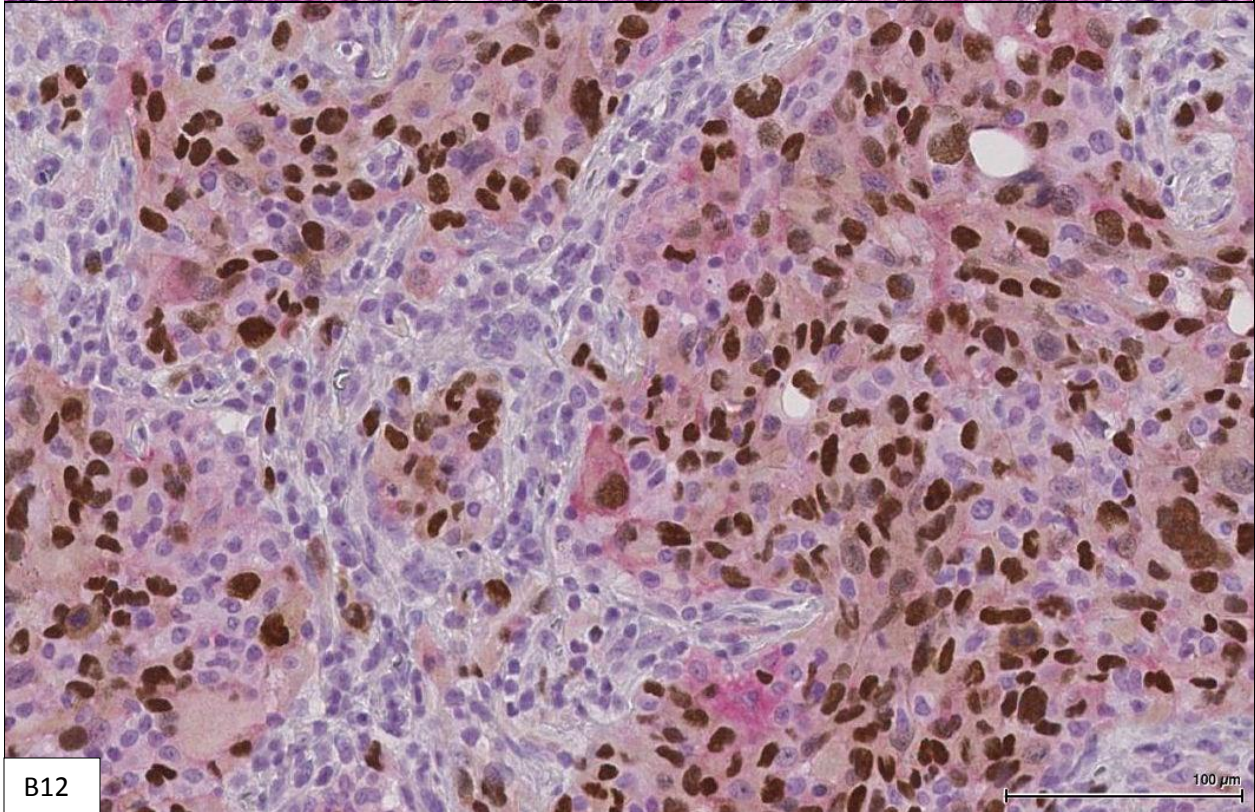

B12



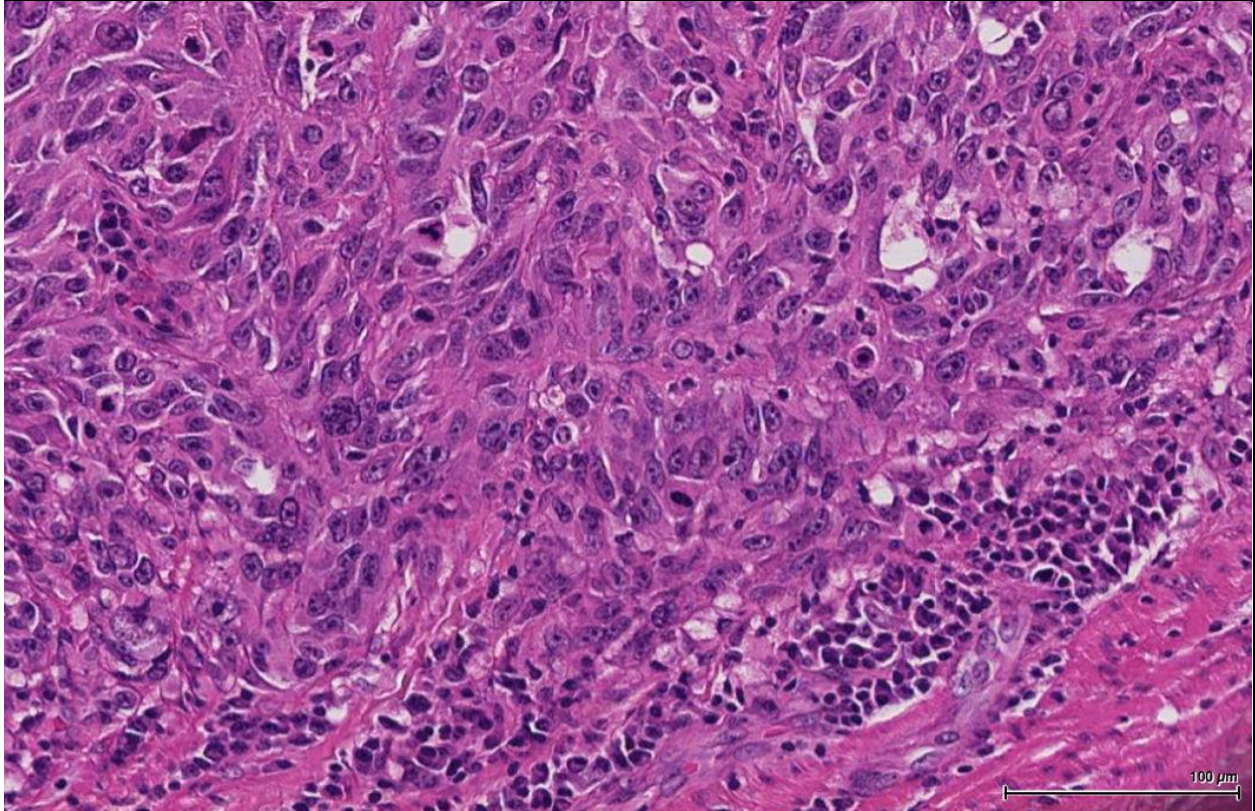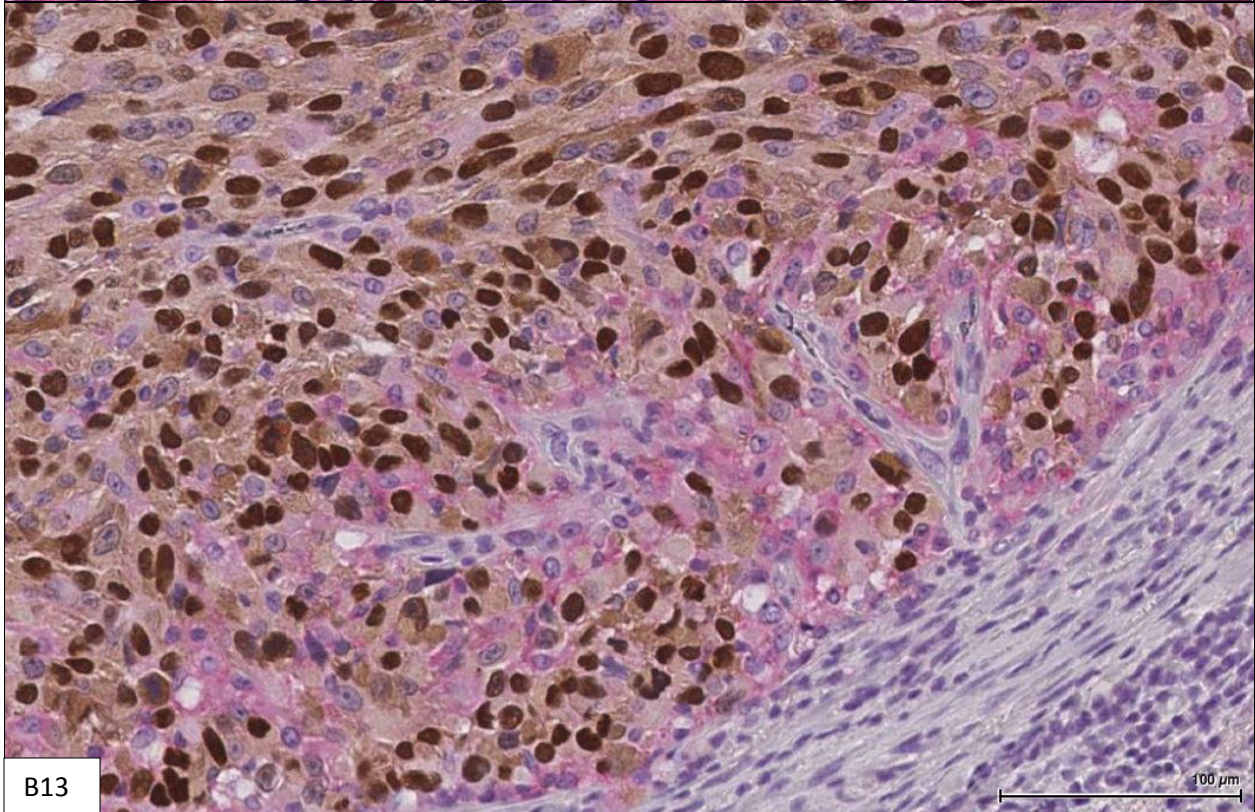

B13



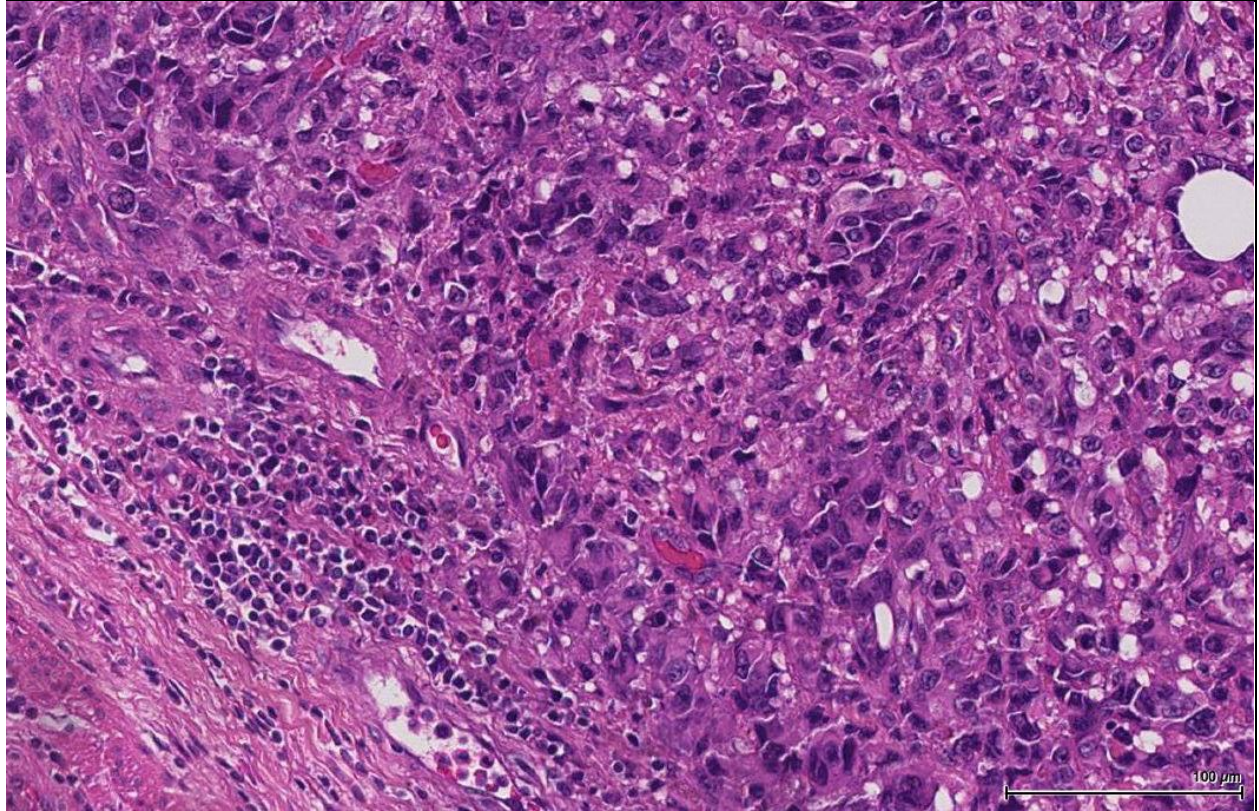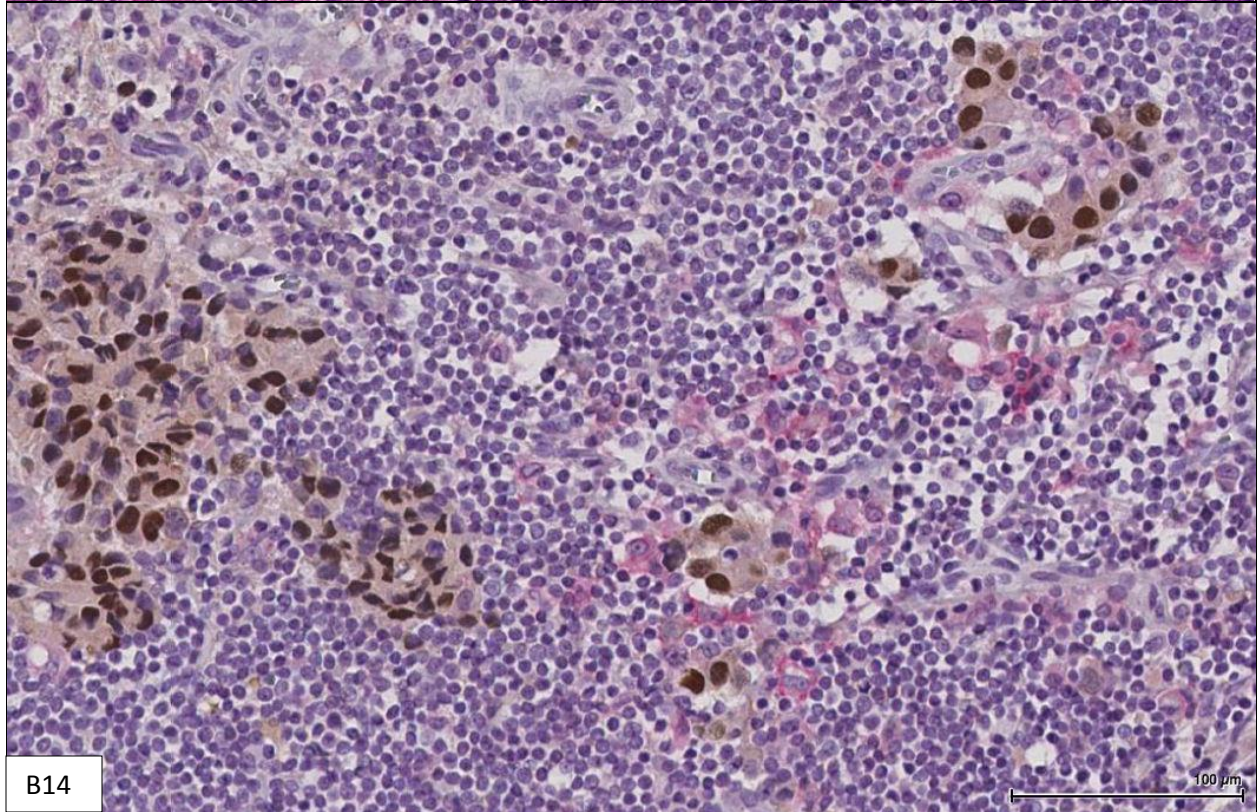

B14



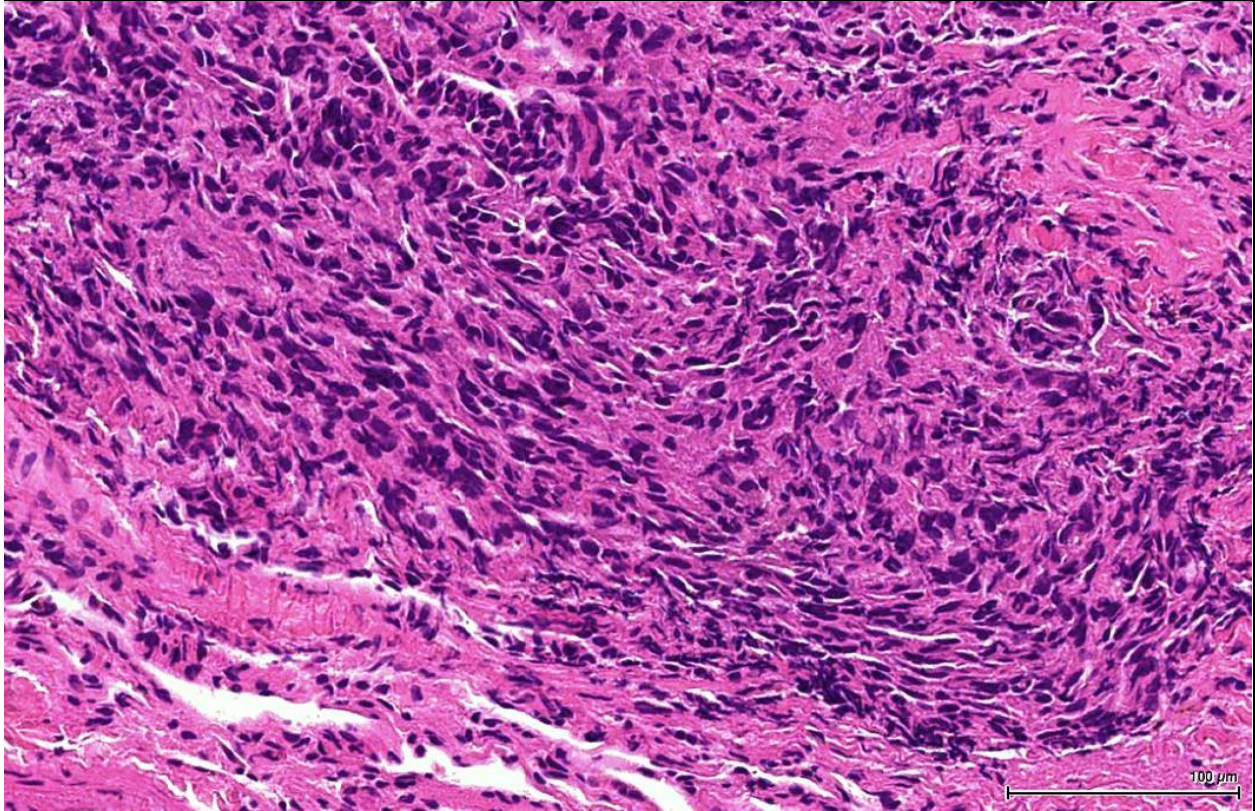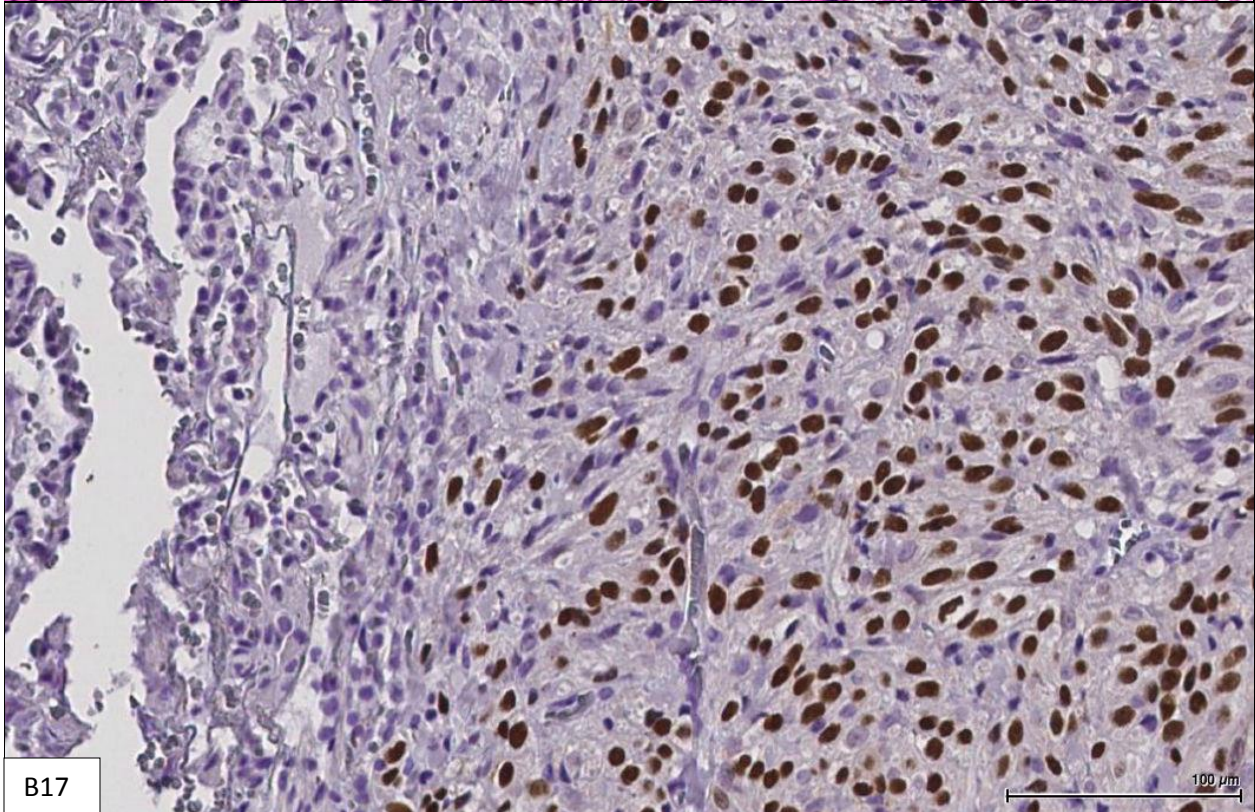

B17



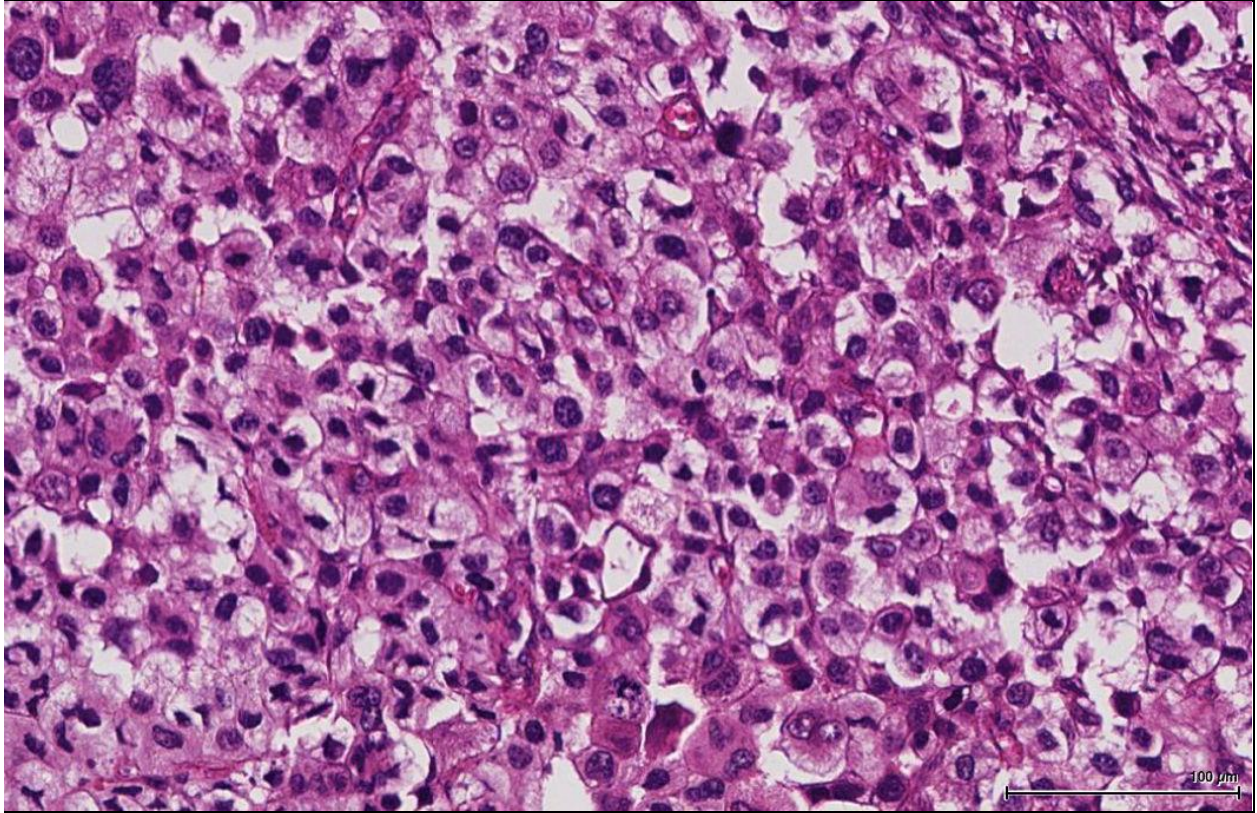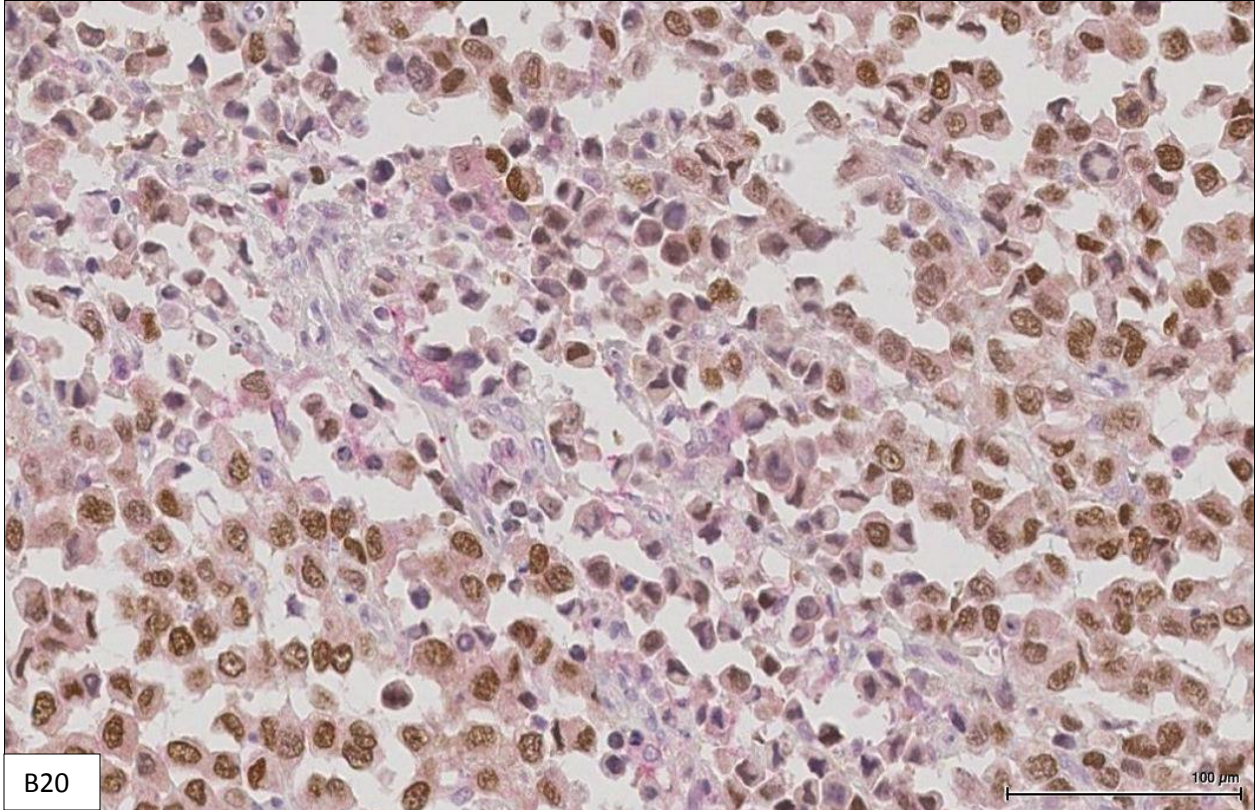

B20



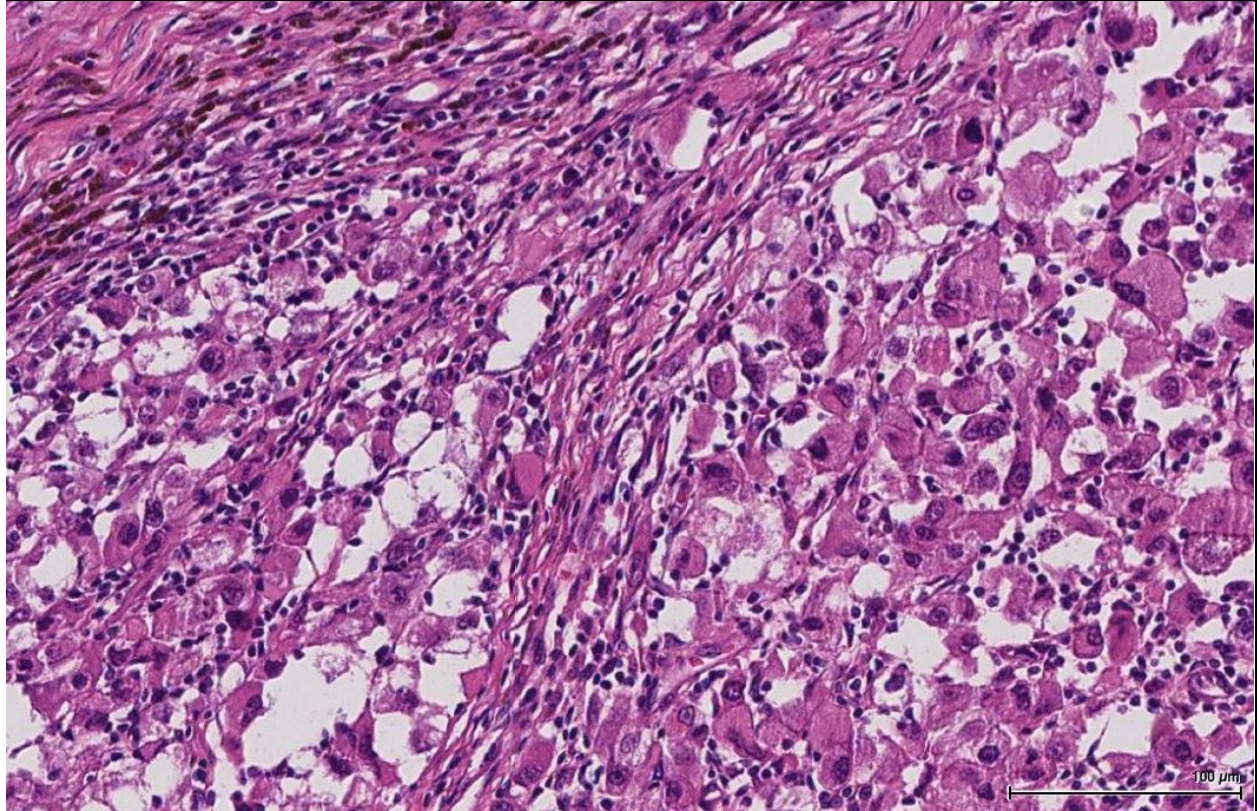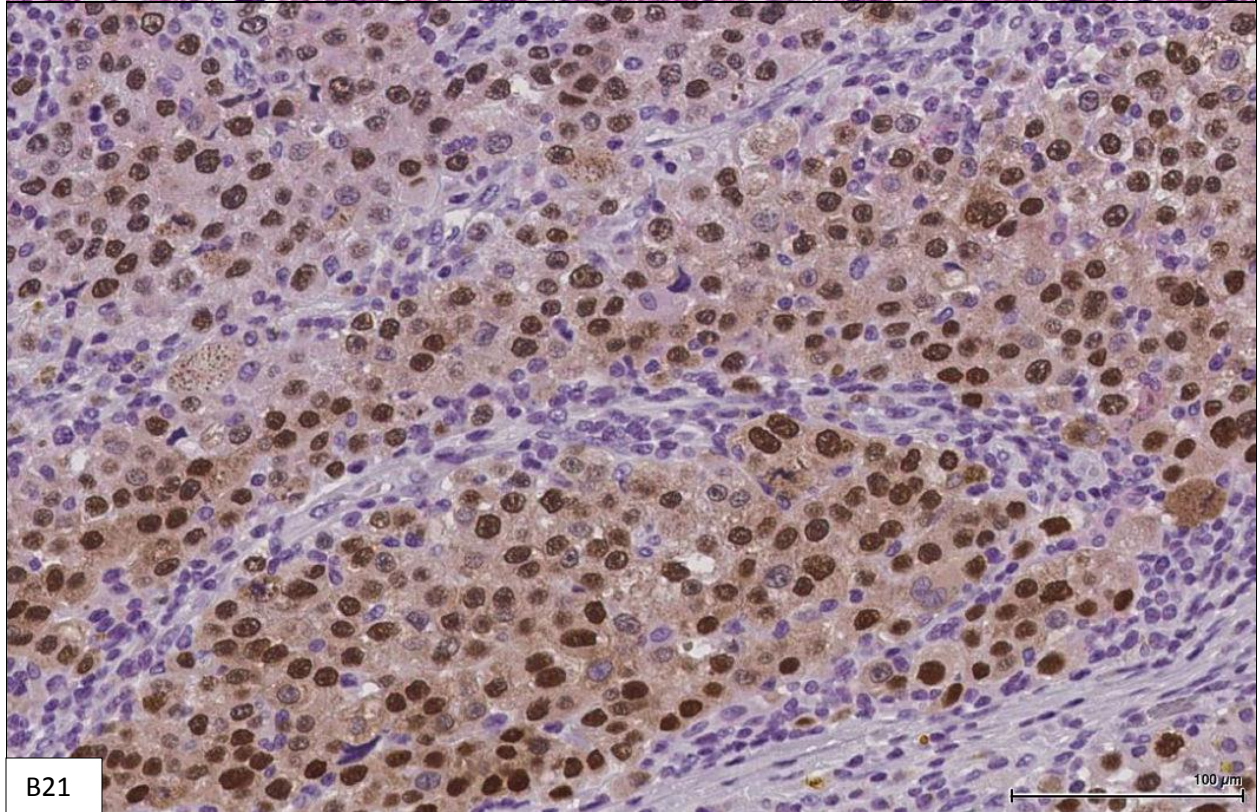

B21



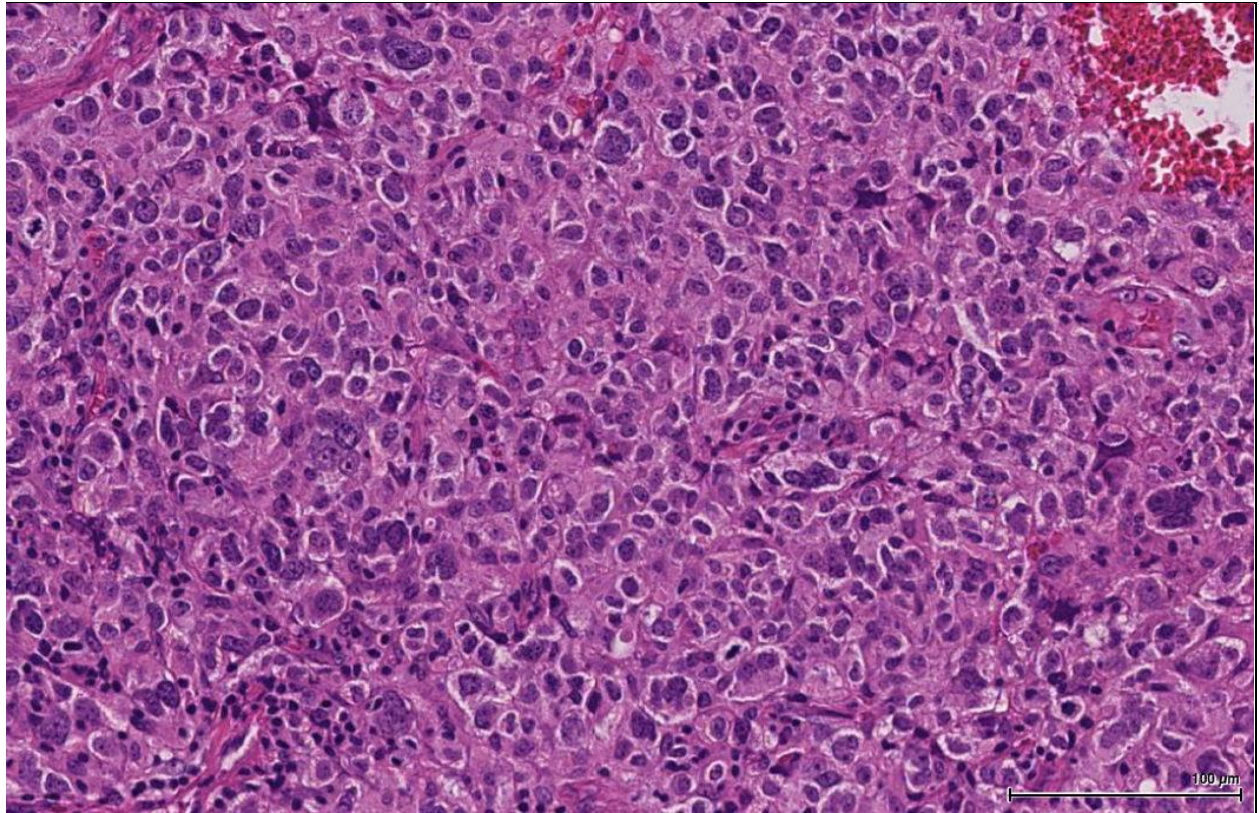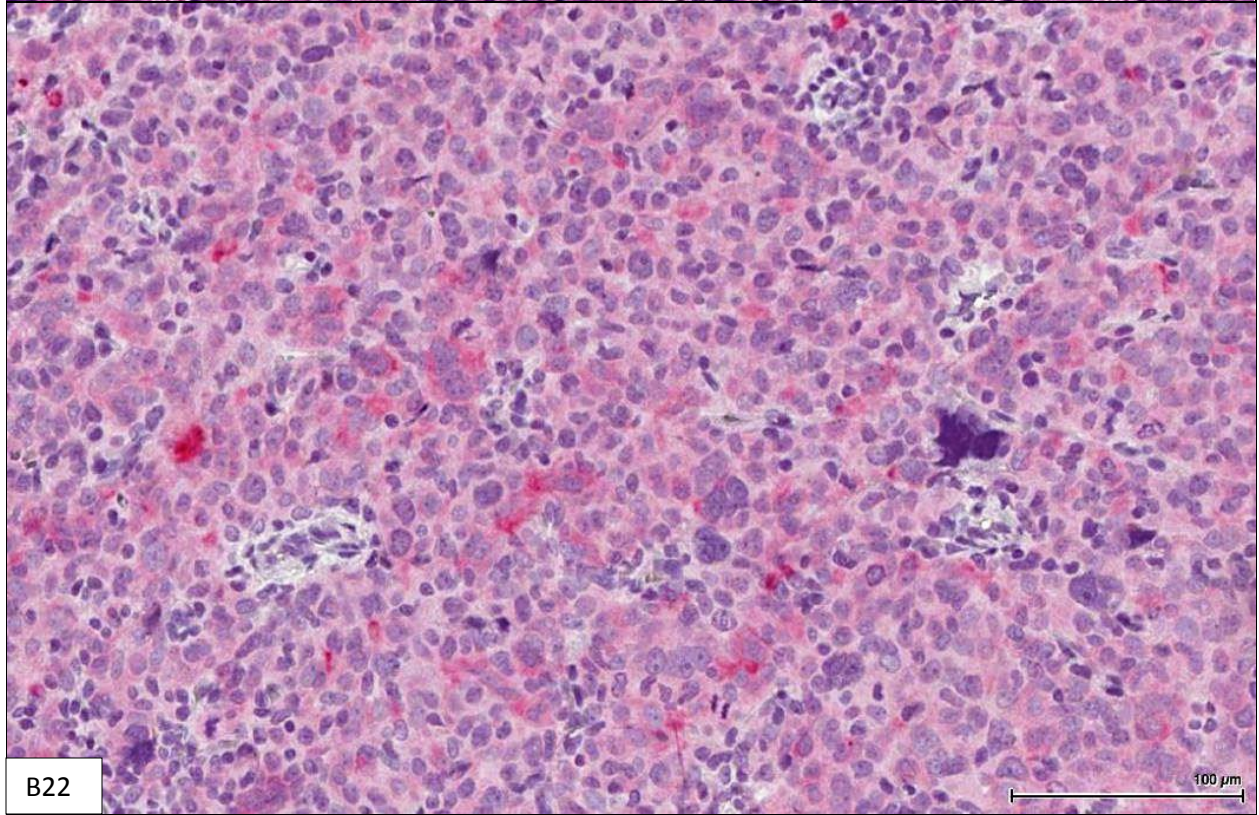

B22



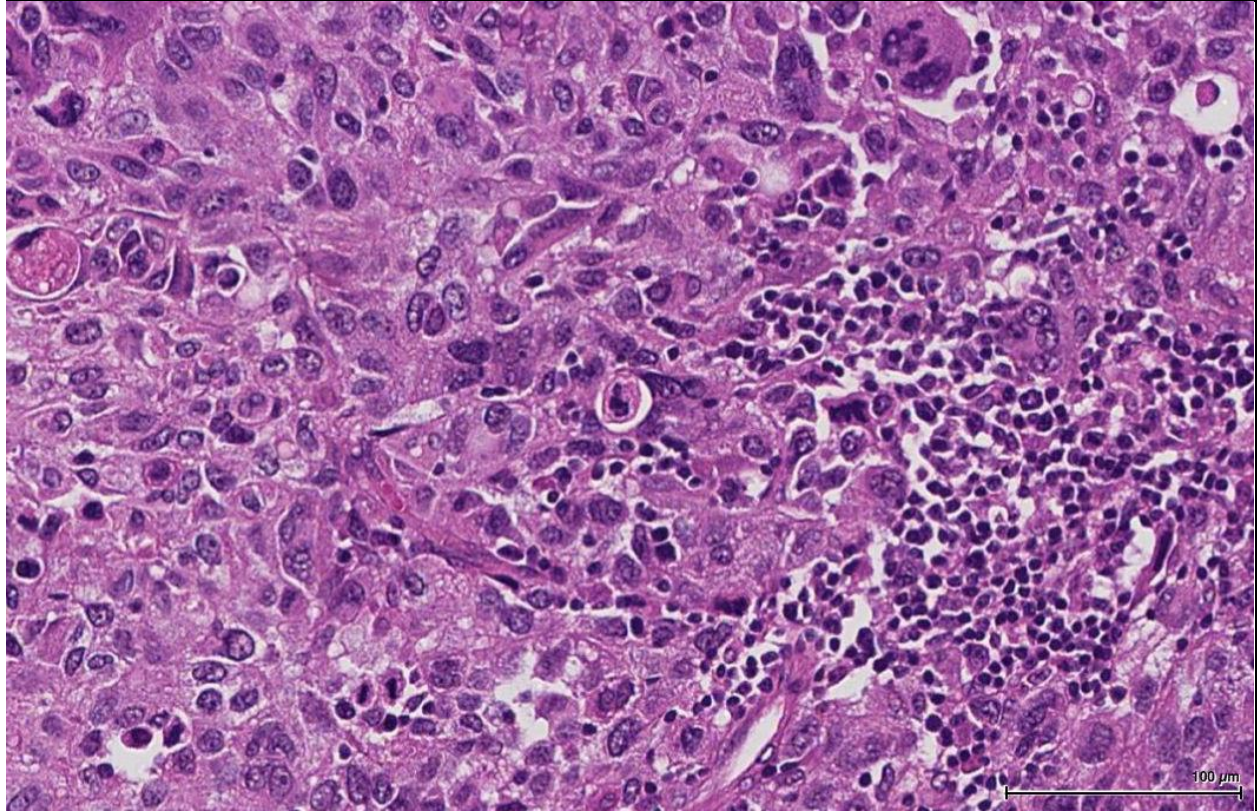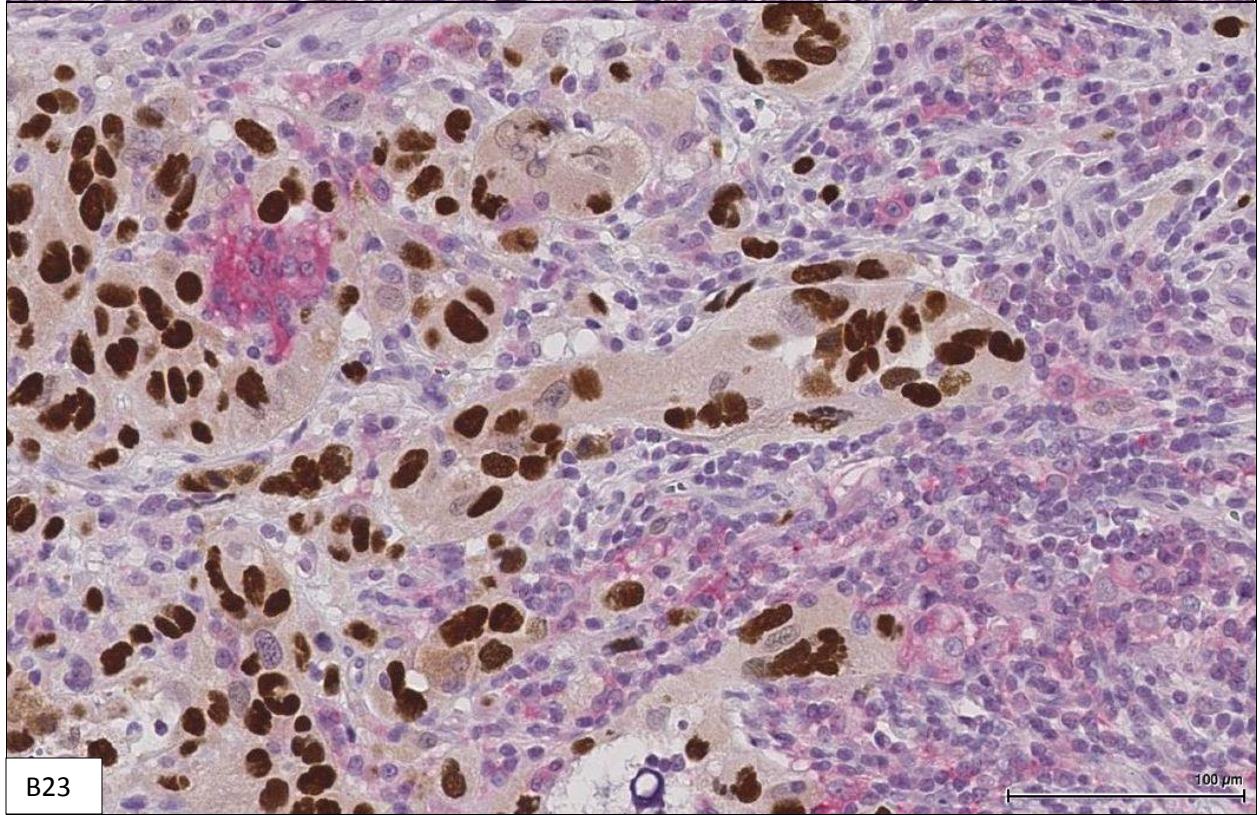

B23



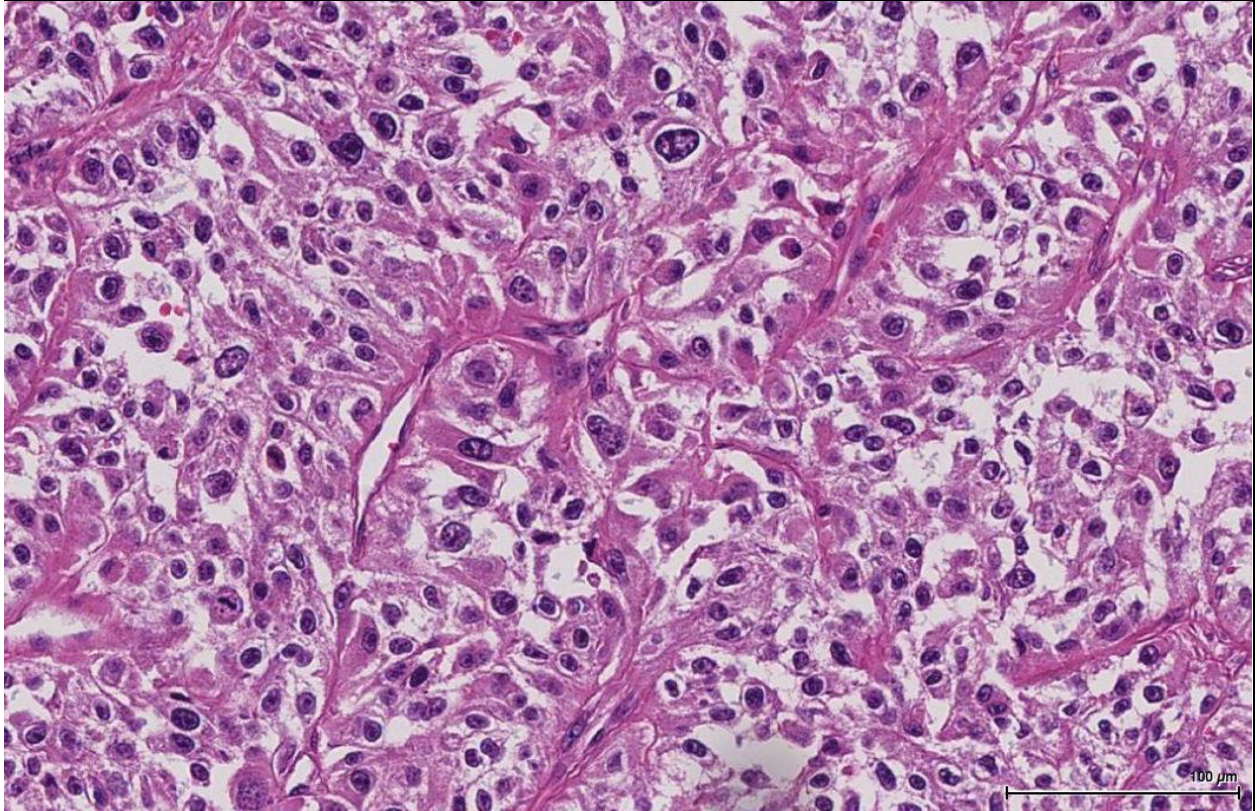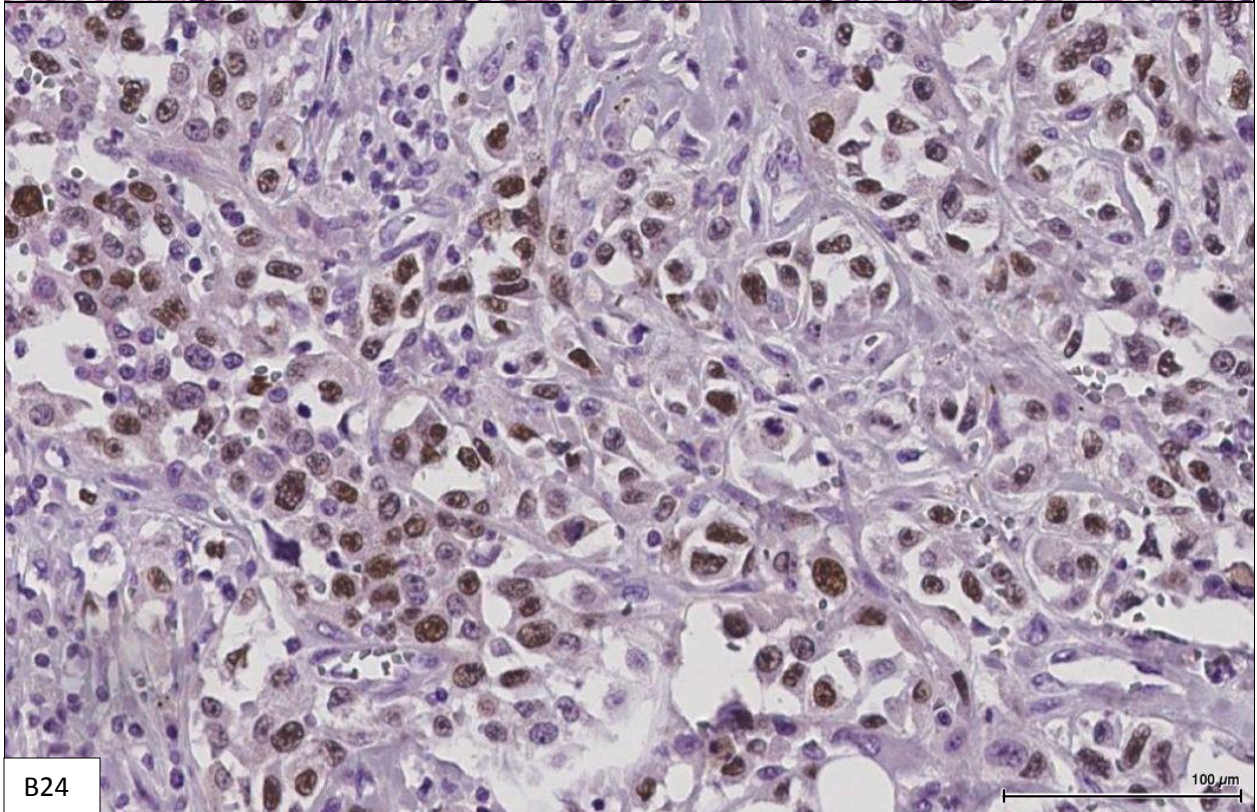

B24



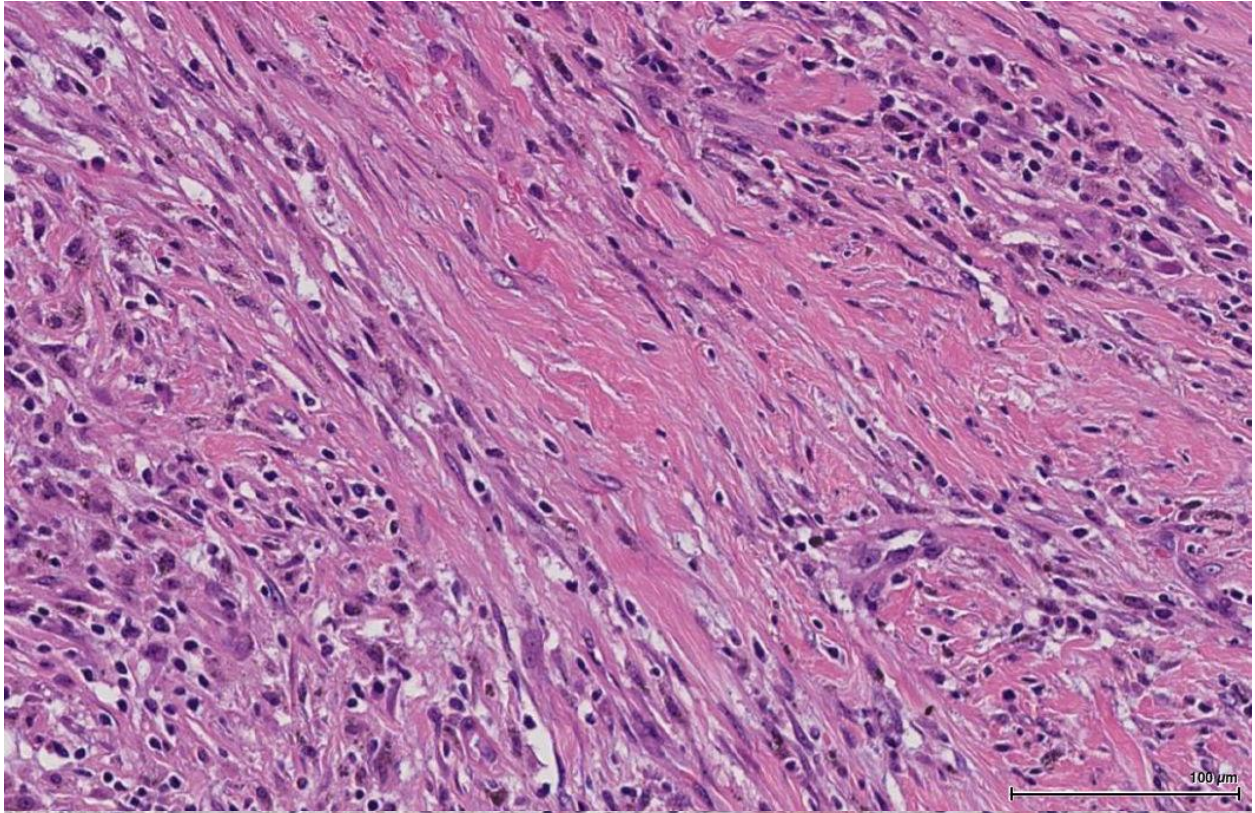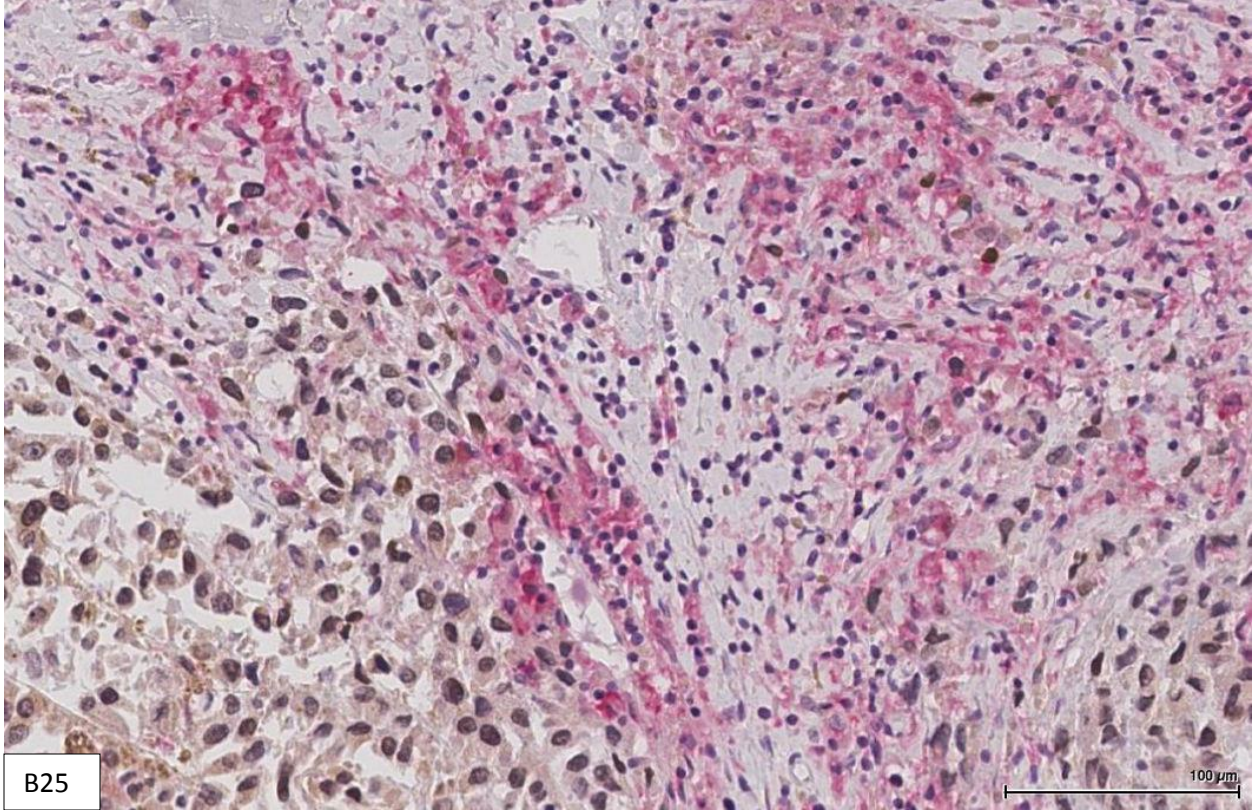



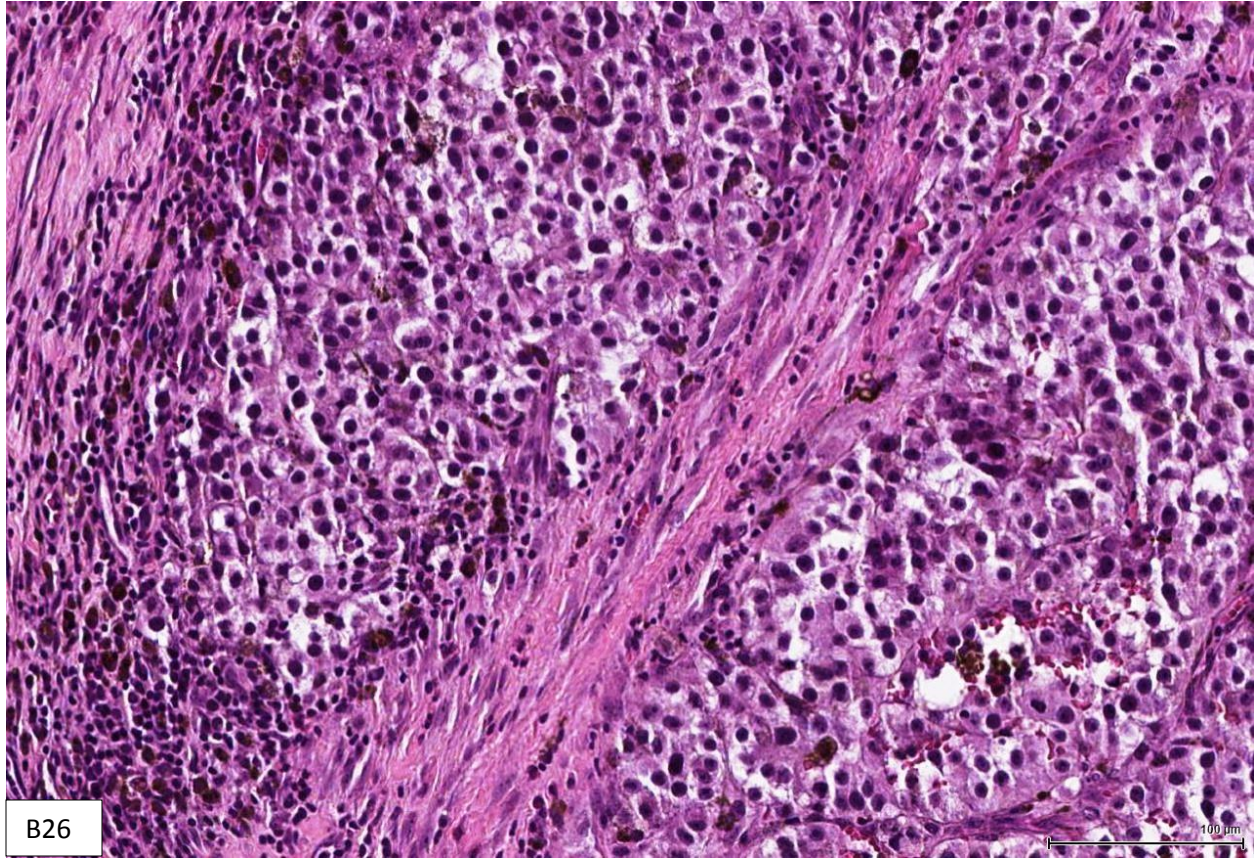



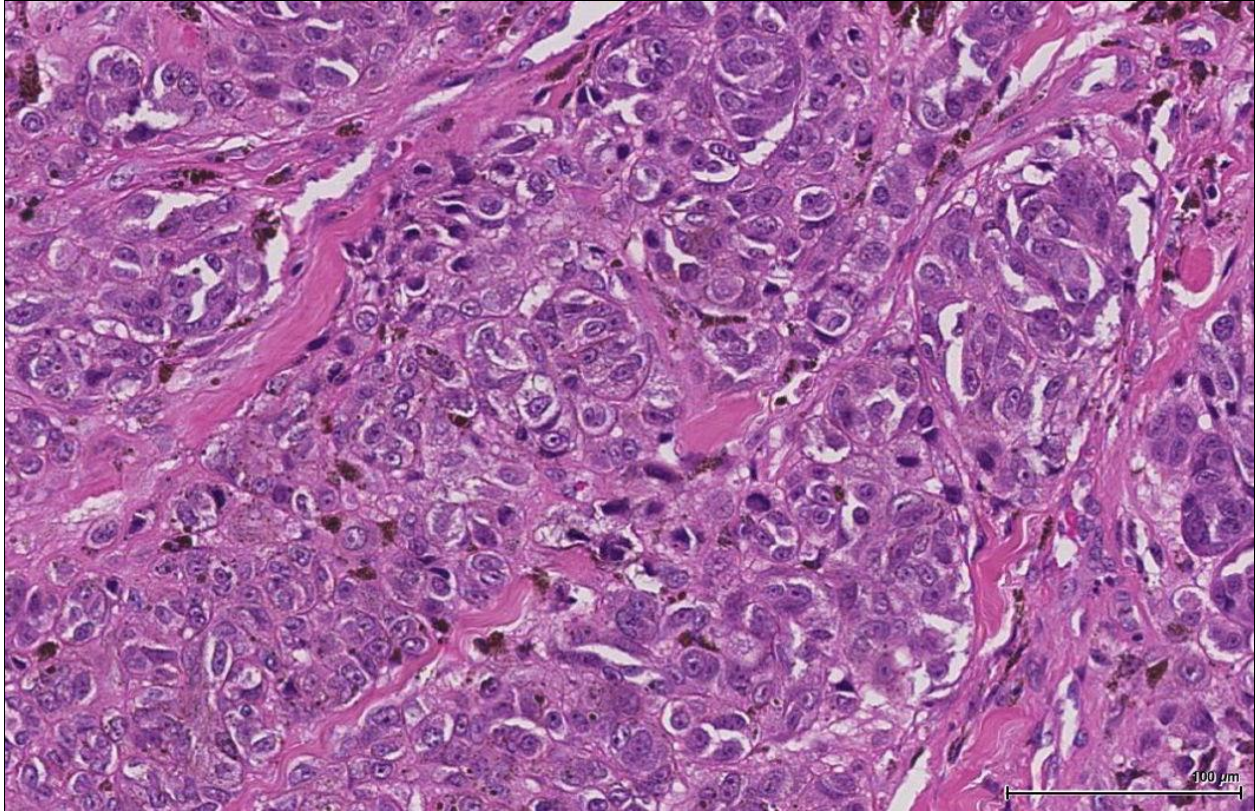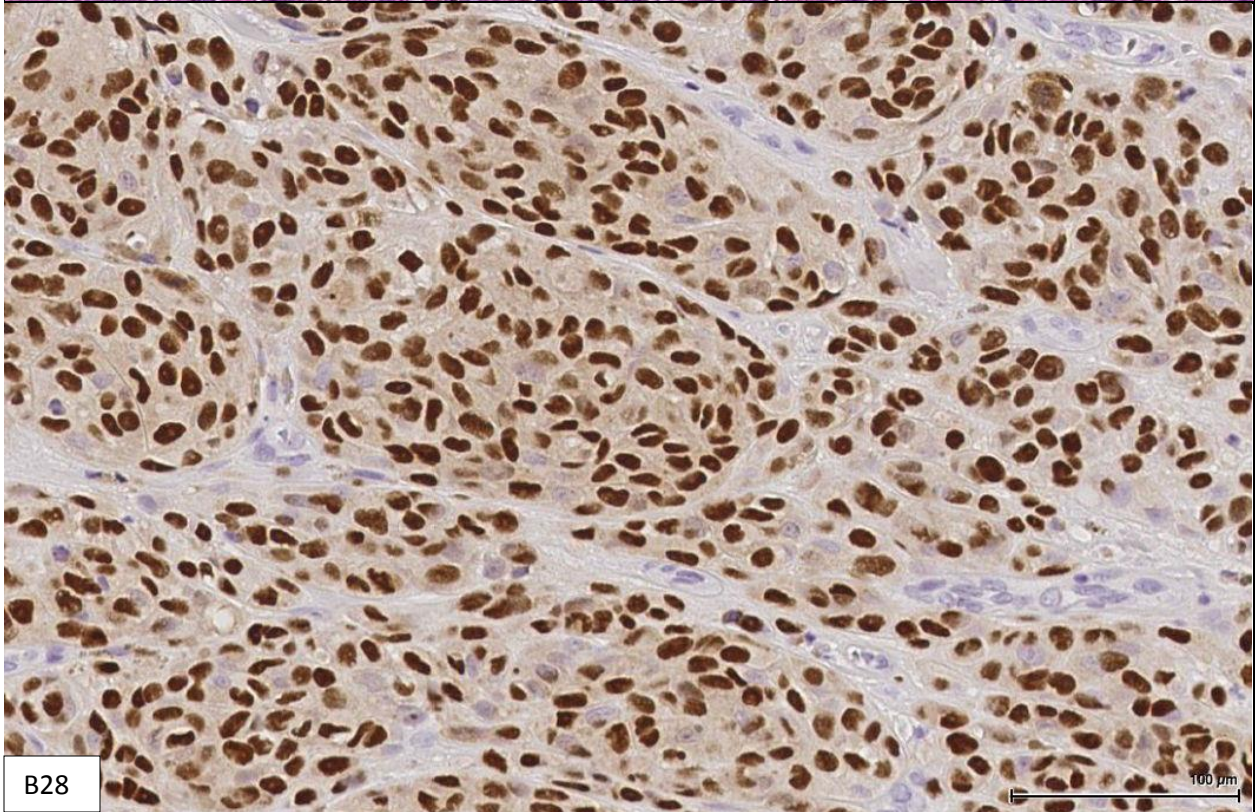

B28



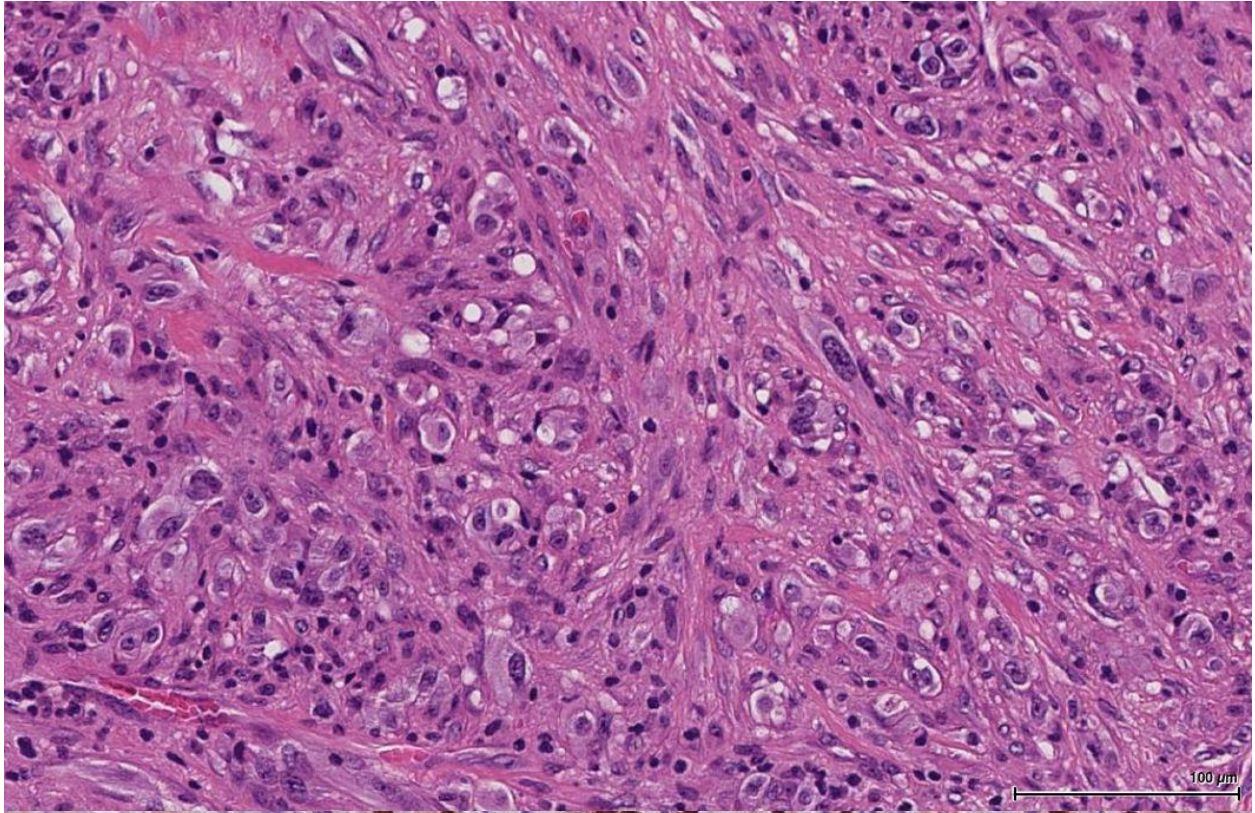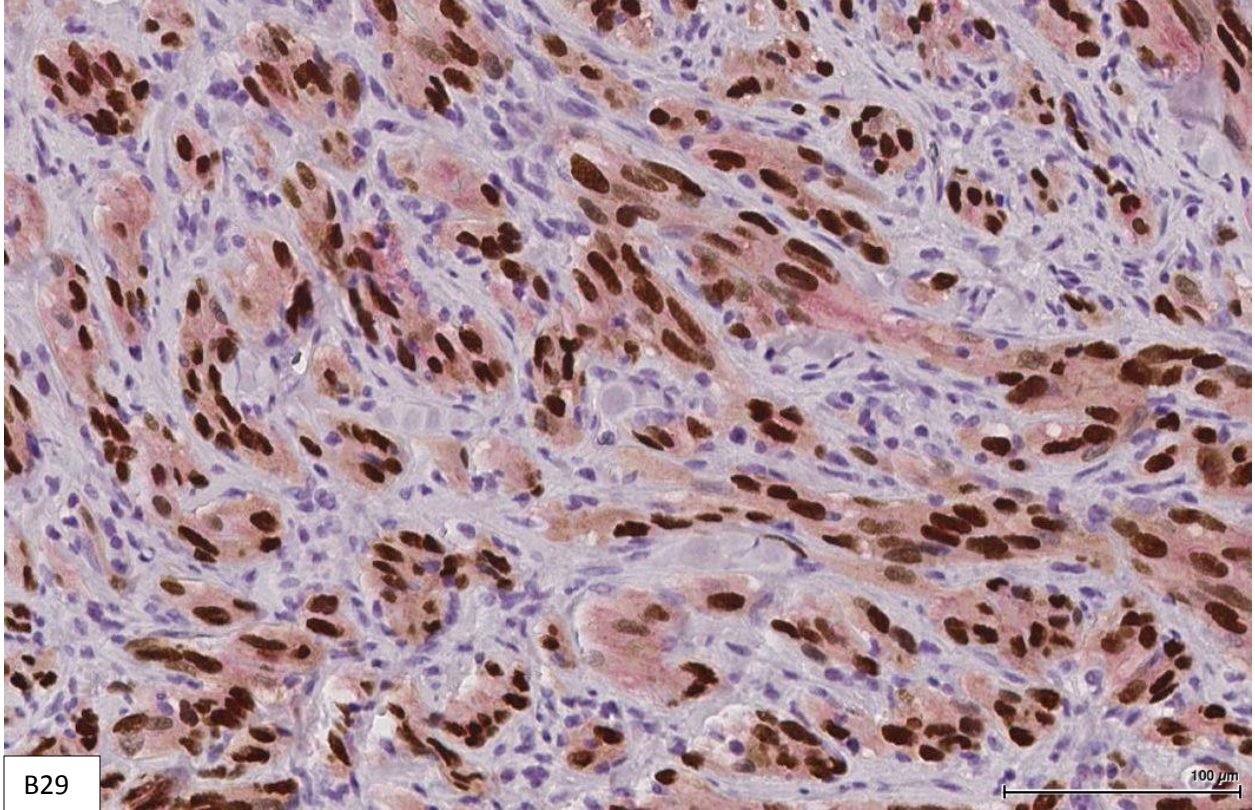

B29
