# Supplementary material for: Quantitative Mass Spectrometry Analysis of PD-L1 Protein Expression, N-glycosylation and Expression Stoichiometry with PD-1 and PD-L2 in Human Melanoma
Source: PubMed Central journal article supplement (PMC5629259; doi:10.1074/mcp.ra117.000037), 2017-05-25
Supplement: supp_RA117.000037_4581_1_supp_1266_nq7nng.pdf [file supp_RA117.000037_4581_1_supp_1266_nq7nng.pdf]

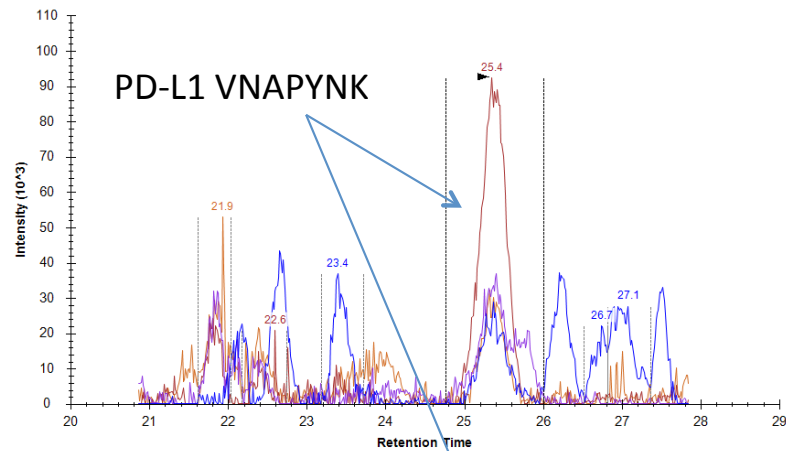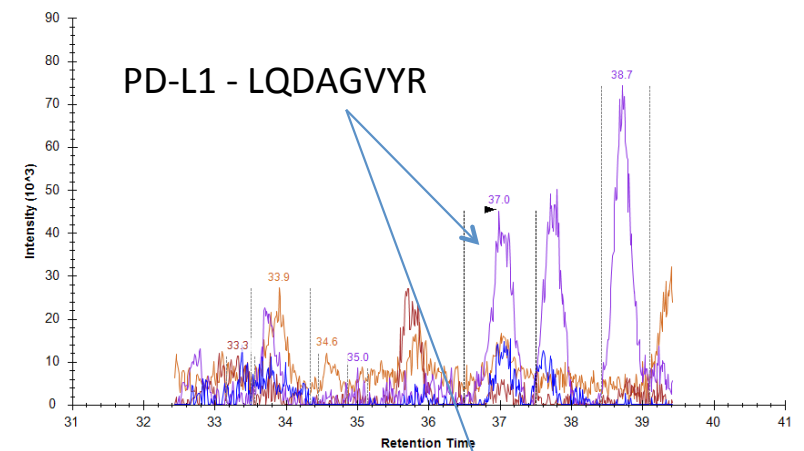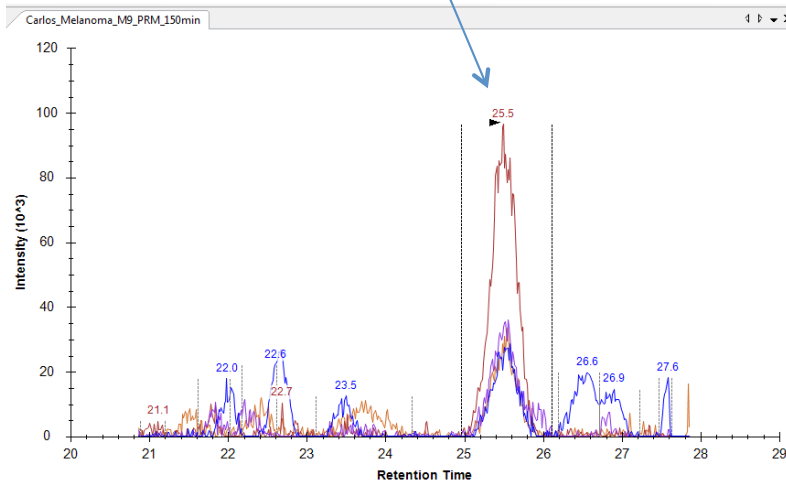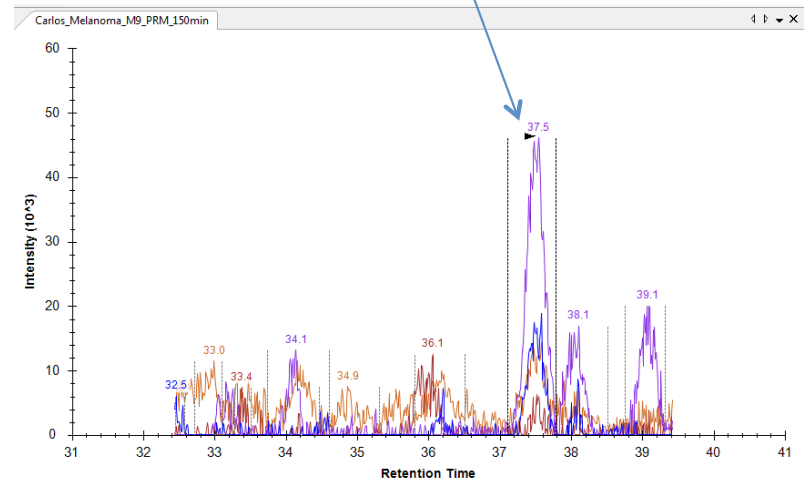

Figure S1. Detection of PD-L1 peptides in long gradient LC-PRM analyses of unfractionated digests from FFPE melanomas.

Data points for PD1L1  
Peptide: LQDAGVYR

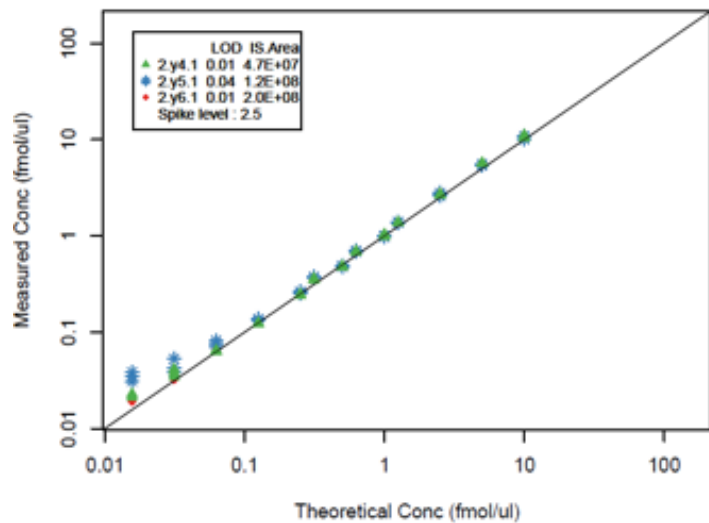

Data points for PD1|NP\_005009.2|  
Peptide: LAAFPEDR

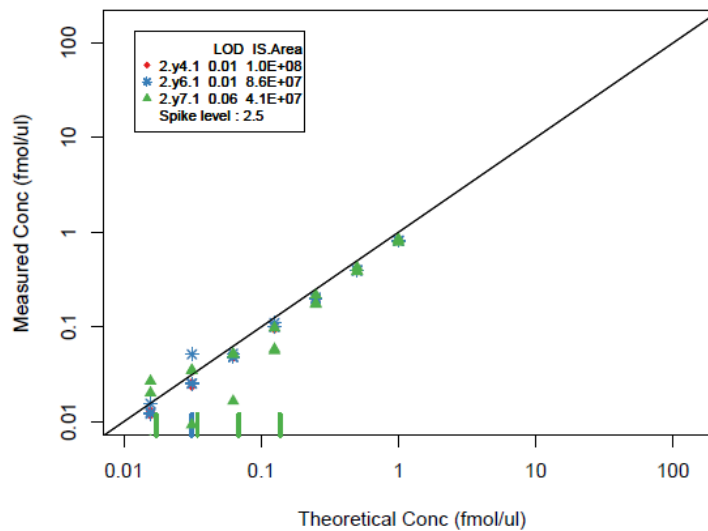

Data points for PD1L1  
Peptide: VNAPYNK

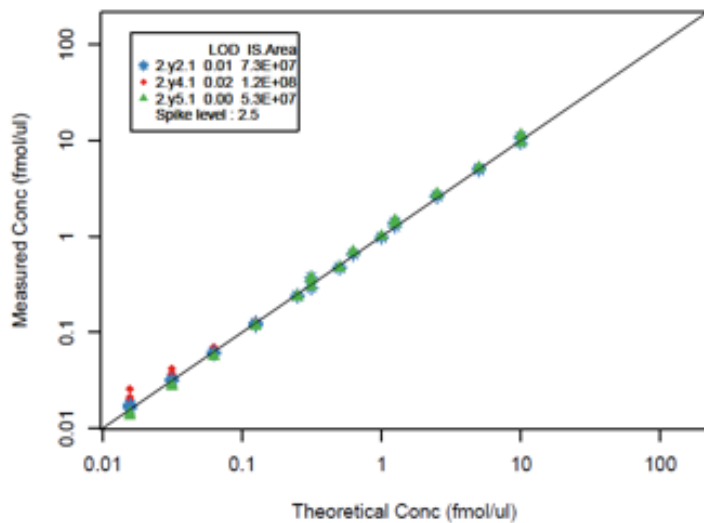

Data points for PDL2  
Peptide: TPEGLYQVTSVLR

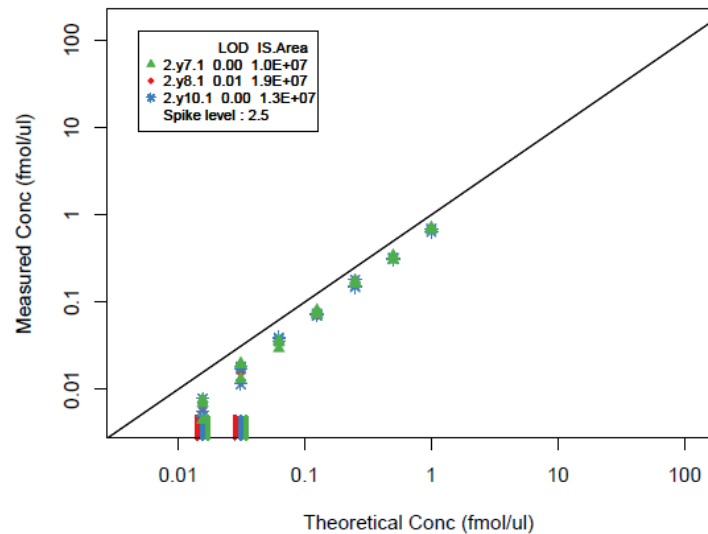

Figure S2. SID calibration curves

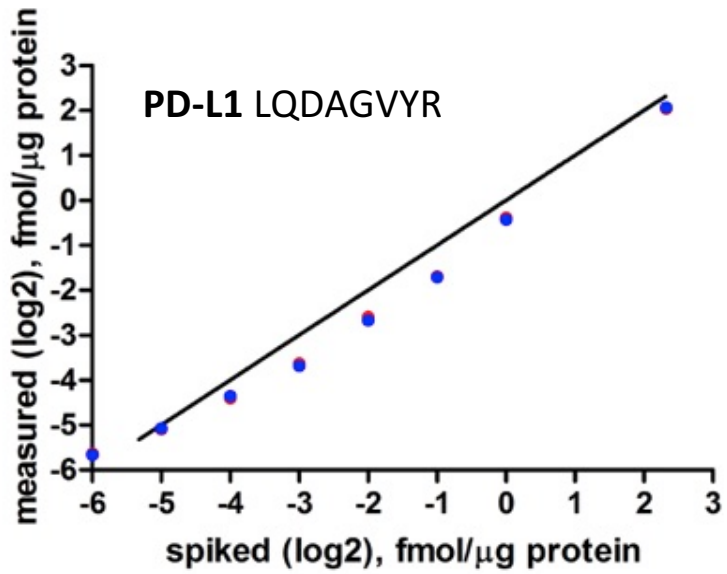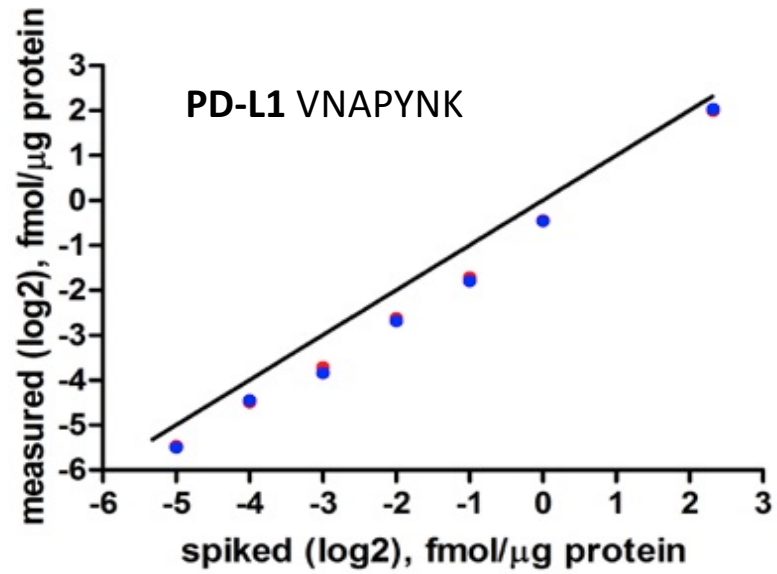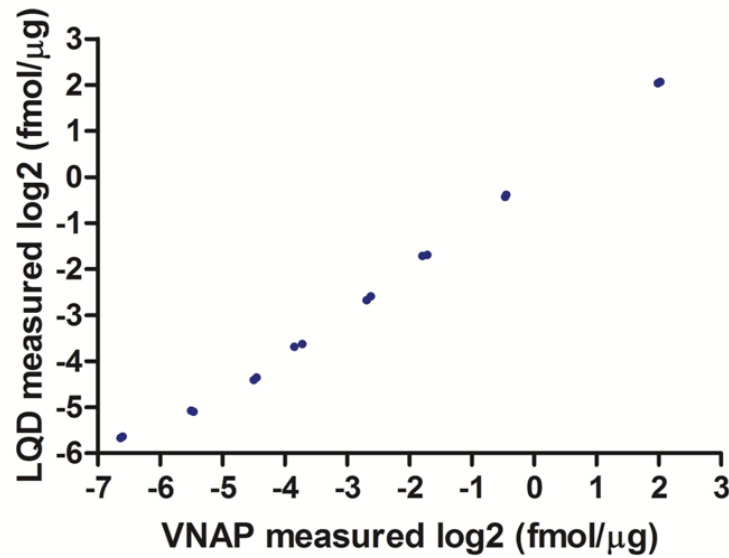

Figure S3. Spike recovery study for recombinant human PD-L1 100  $\mu$ g HEK293 cell lysate 0.031, 0.063, 0.125, 0.25, 0.5, 1 or 5 fmol/microgram protein.

061116\_PDL1\_PNG\_25ng #9055-9082 RT: 42.35-42.45 AV: 4 NL: 2  
F: FTMS + p NSI Full ms2 525.80@hcd20.00 [200.00-1090.00]

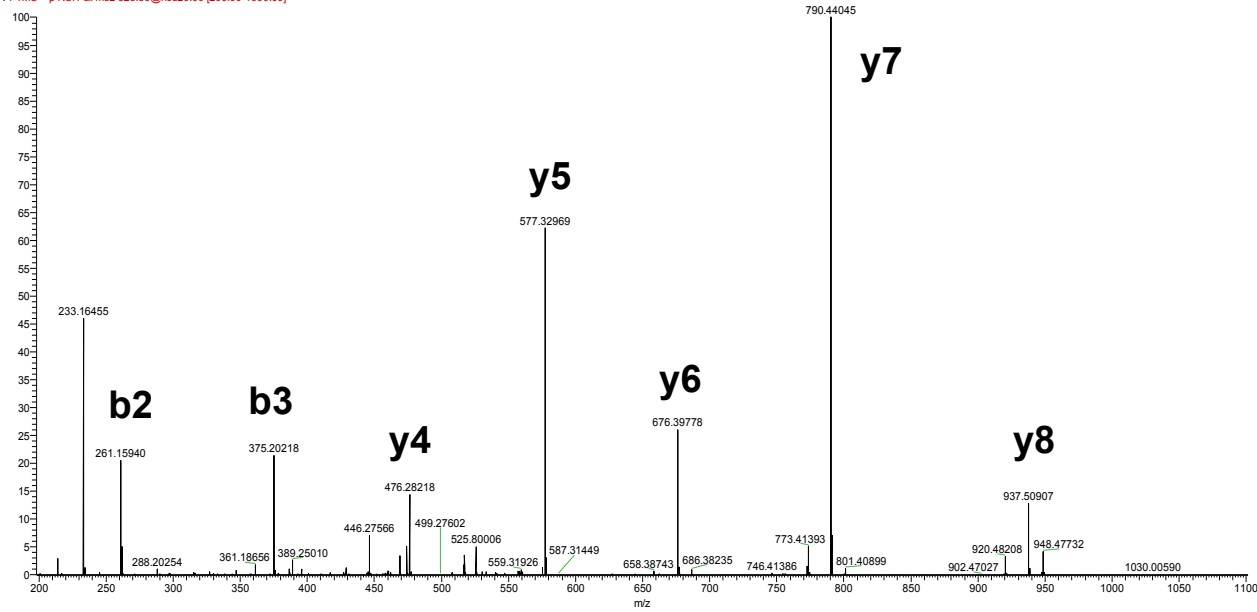

LFNVTSTLR

061116\_PDL1\_PNG\_25ng #9354-9400 RT: 43.74-43.91 AV: 7 NL: 1.82  
F: FTMS + p NSI Full ms2 526.29@hcd20.00 [200.00-1090.00]

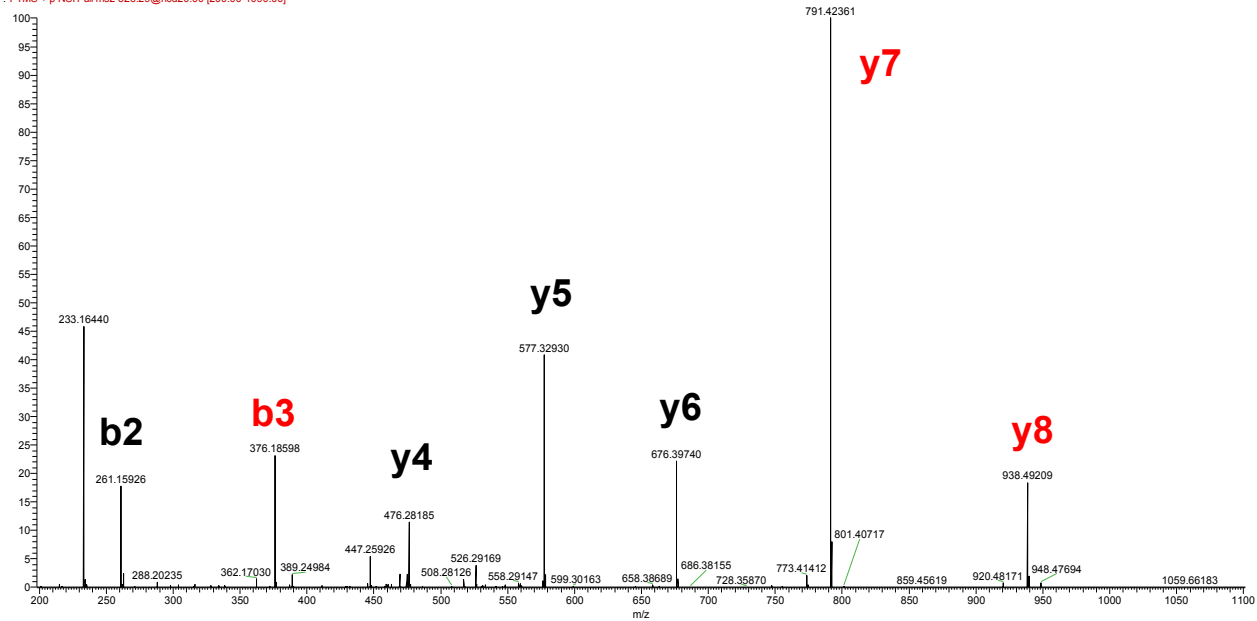

LFDVTSTLR

(fragments with m/z shift  
from N → D substitution  
labeled in red)

Figure S4. MS/MS spectra of PD-L1 LFNVTSTLR peptide and LFDVTSTLR peptide released by PNGase F treatment of recombinant human PD-L1 tryptic digest.

061116\_PDL1\_PNG\_25ng #10437-10483 RT: 48.82-48.98 AV: 6 NL: 1  
F: FTMS + p NSI Full ms2 890.42@hcd20.00 [200.00-1835.00]

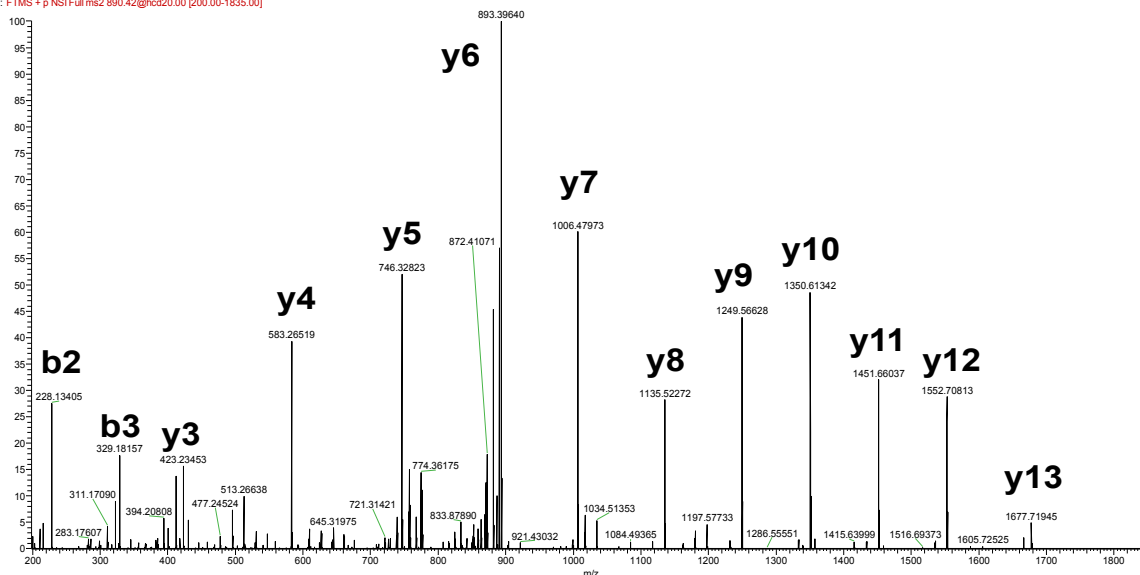

INTTTNEIFYCTFR

061116\_PDL1\_PNG\_25ng #10640-10699 RT: 49.75-50.01 AV: 9 NL: 4  
F: FTMS + p NSI Full ms2 890.91@hcd20.00 [200.00-1835.00]

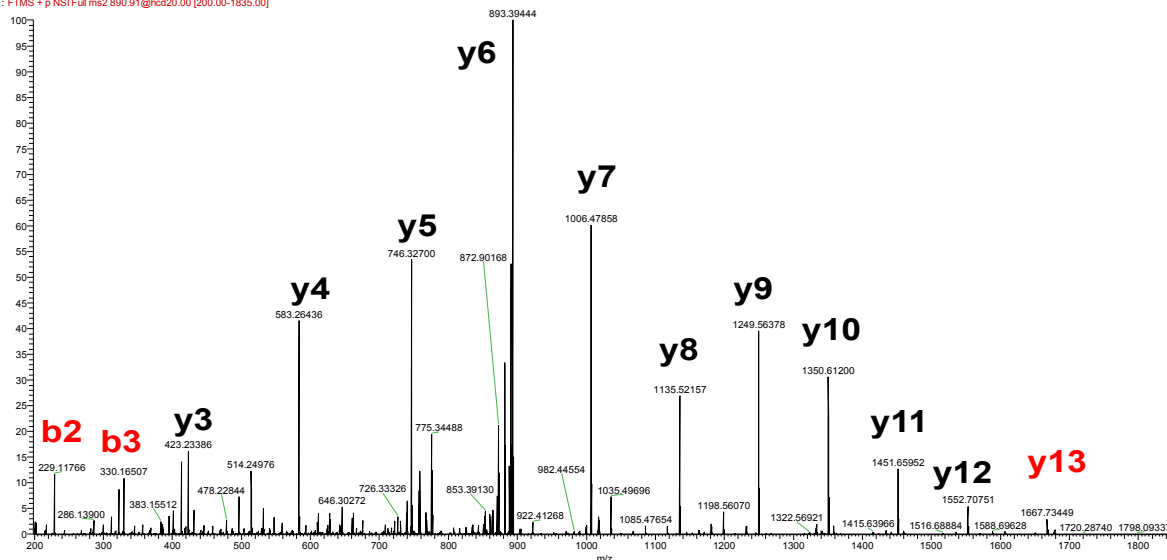

IDTTTNEIFYCTFR

(fragments with m/z shift  
from N → D substitution  
labeled in red)

Figure S5. MS/MS spectra of PD-L1 INTTTNEIFYCTFR peptide and L1 IDTTTNEIFYCTFR peptide released by PNGase F treatment of recombinant human PD-L1 tryptic digest.

061116\_PDL1\_PNG\_25ng #10064-10138 RT: 47.04-47.37 AV: 11 NL: 1  
F: FTMS + p NSI Full ms2 960.94@hcd20.00 [200.00-1980.00]

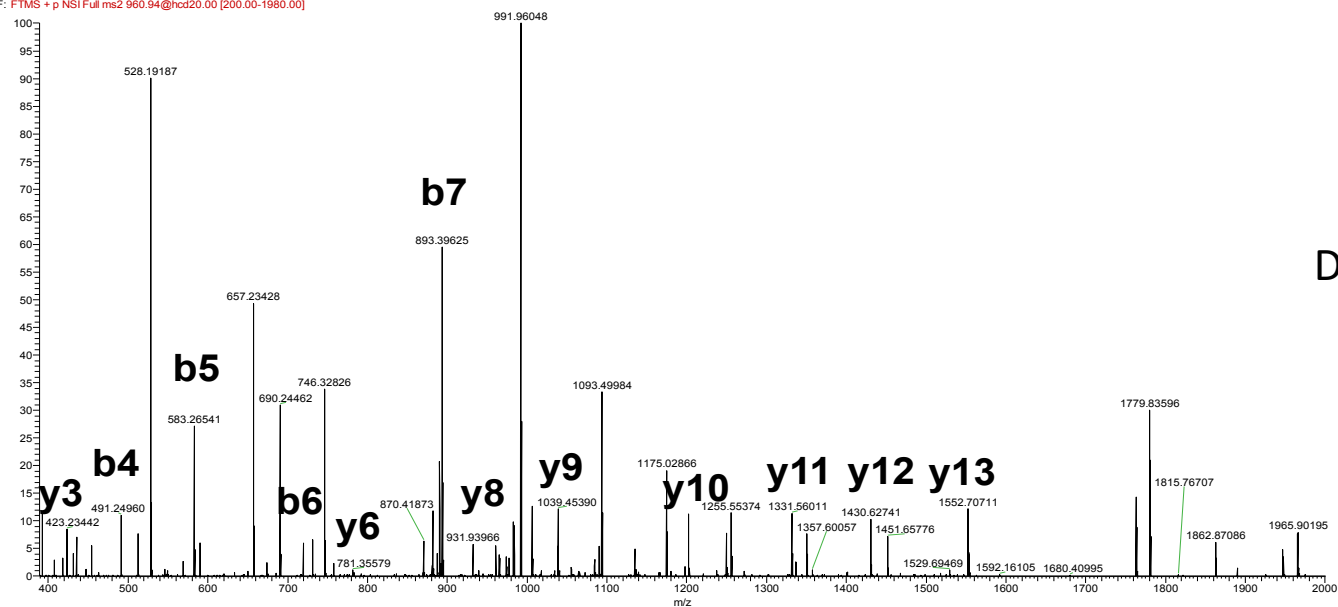

DLYVVEYGSNMEIECK

061116\_PDL1\_PNG\_25ng #10315-10362 RT: 48.21-48.41 AV: 7 NL: 2  
F: FTMS + p NSI Full ms2 961.43@hcd20.00 [200.00-1980.00]

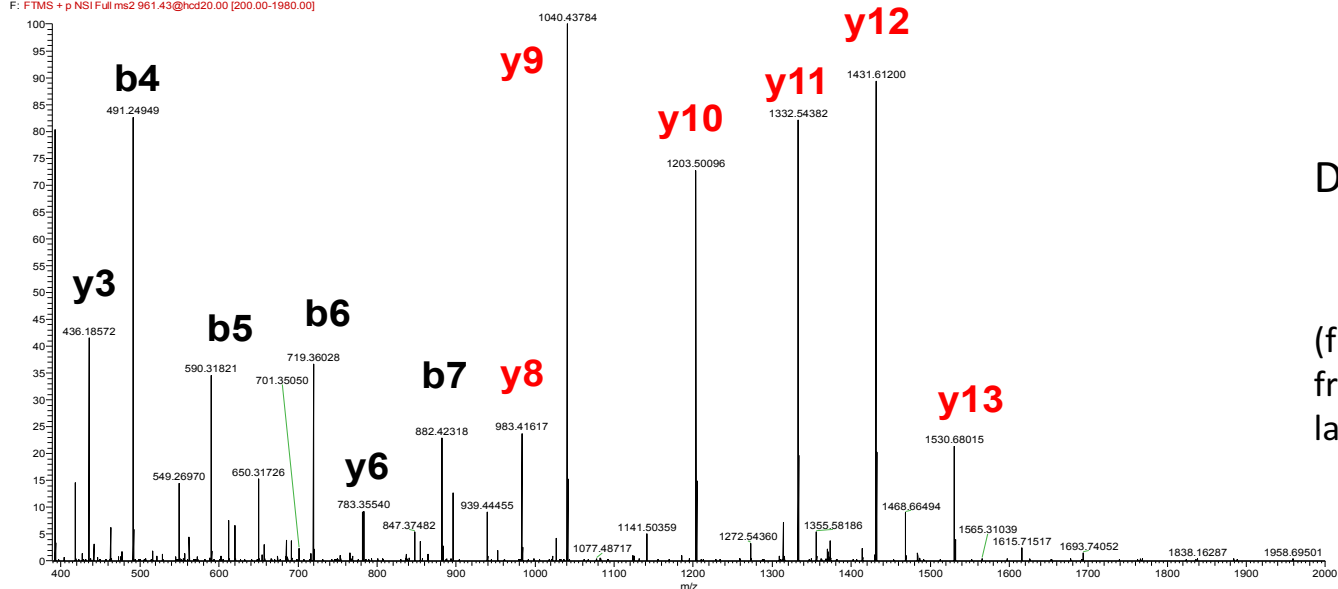

DLYVVEYGS DMEIECK

(fragments with m/z shift from N → D substitution labeled in red)

Figure S6. MS/MS spectra of PD-L1 DLYVVEYGSNMEIECK peptide and L1 DLYVVEYGS DMEIECK peptide released by PNGase F treatment of recombinant human PD-L1 tryptic digest.

161019\_LFN\_All\_glyco\_#2686-2706 RT: 7.15-7.18 AV: 2 NL: 4.48E7  
F: FTMS + p NSI Full ms2 1134.01@hcd18.00 [200.00-2330.00]

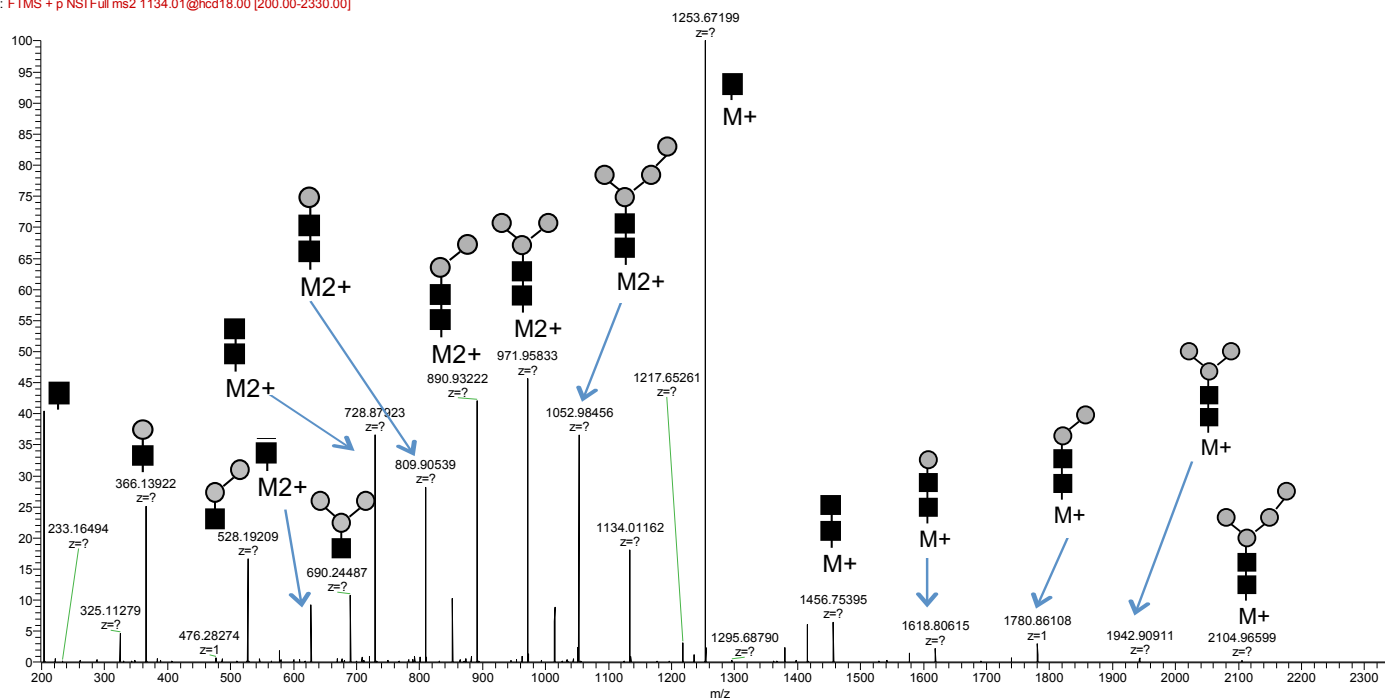

Recomb PD-L1

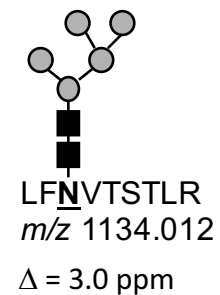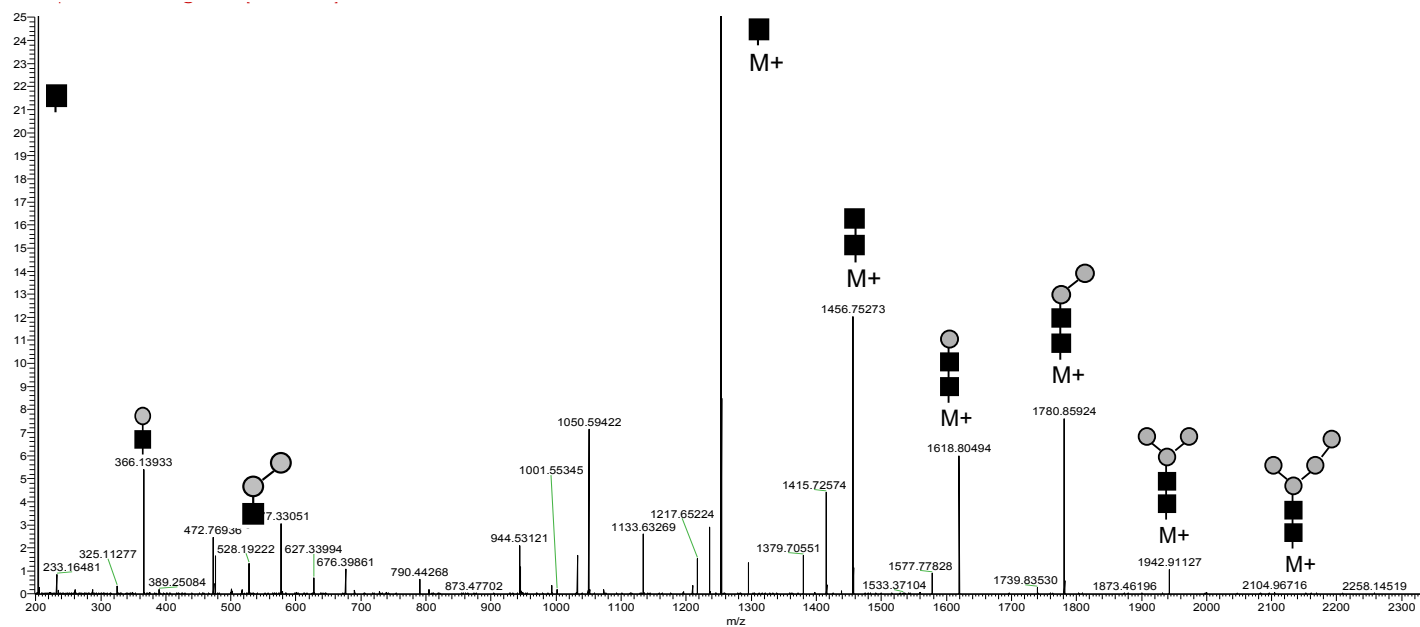

Melanoma B14

Figure S7

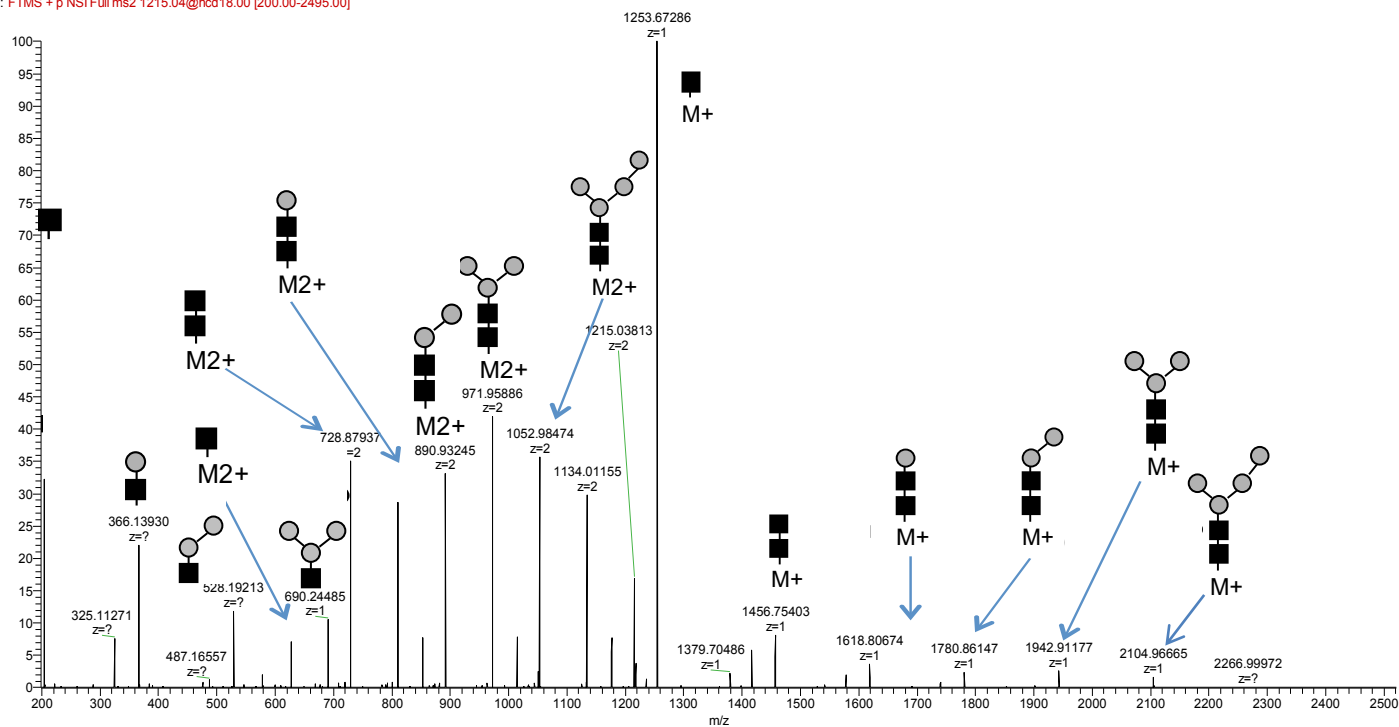

### Recomb PD-L1

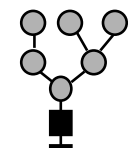

LFNVTSTLR

m/z 1215.0386 (+2)

$\Delta = 2.9$  ppm

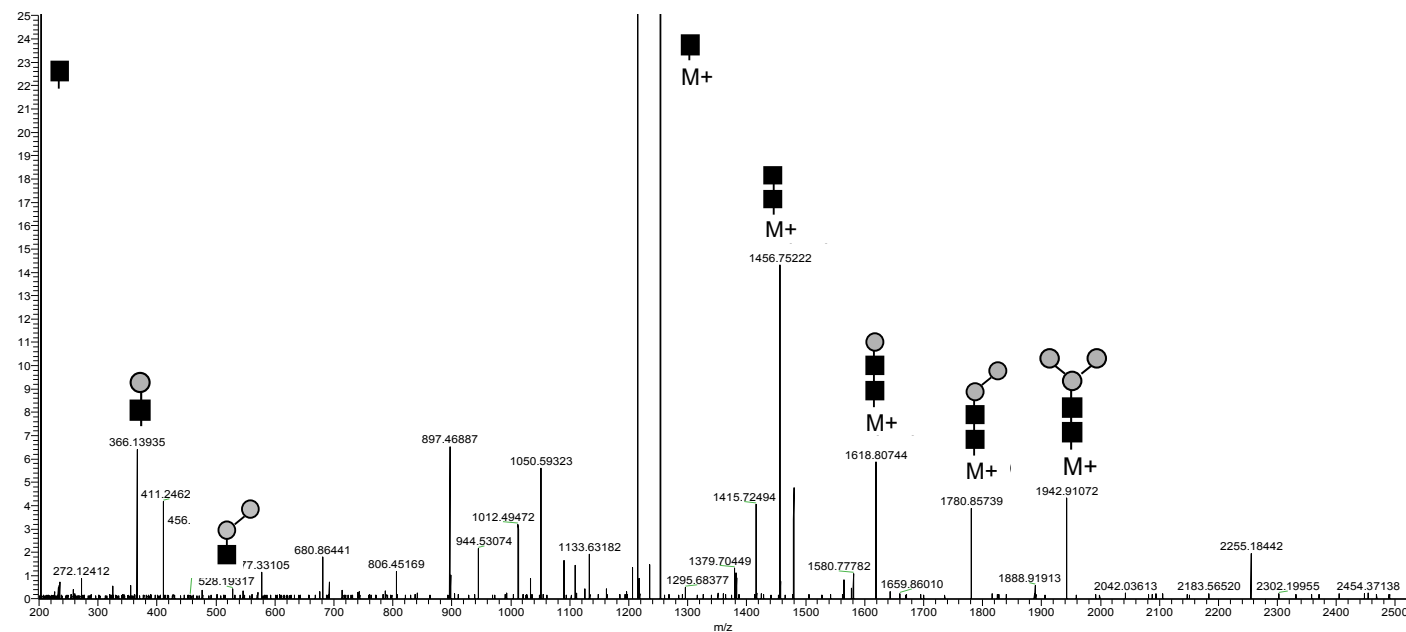

### Melanoma B14

Figure S8



161019\_LFN\_All\_glyco #2661-2689 RT: 7.10-7.16 AV: 3 NL: 1.35E7  
 F: FTMS + p NSI Full ms2 1296.06@hcd18.00 [200.00-2660.00]

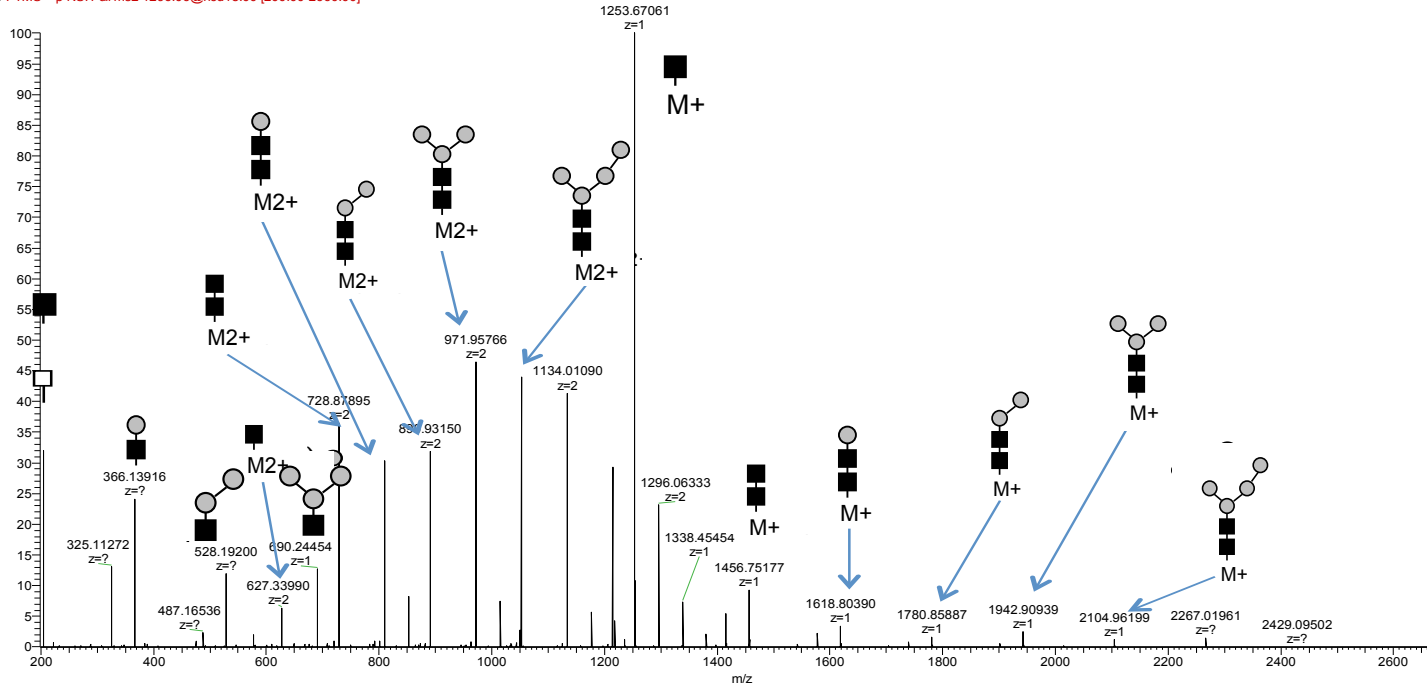

Recomb PD-L1

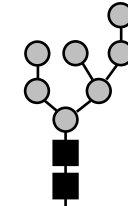

LFNVTSTLR  
 m/z 1296.065 (+2)

$\Delta = 3.0$  ppm

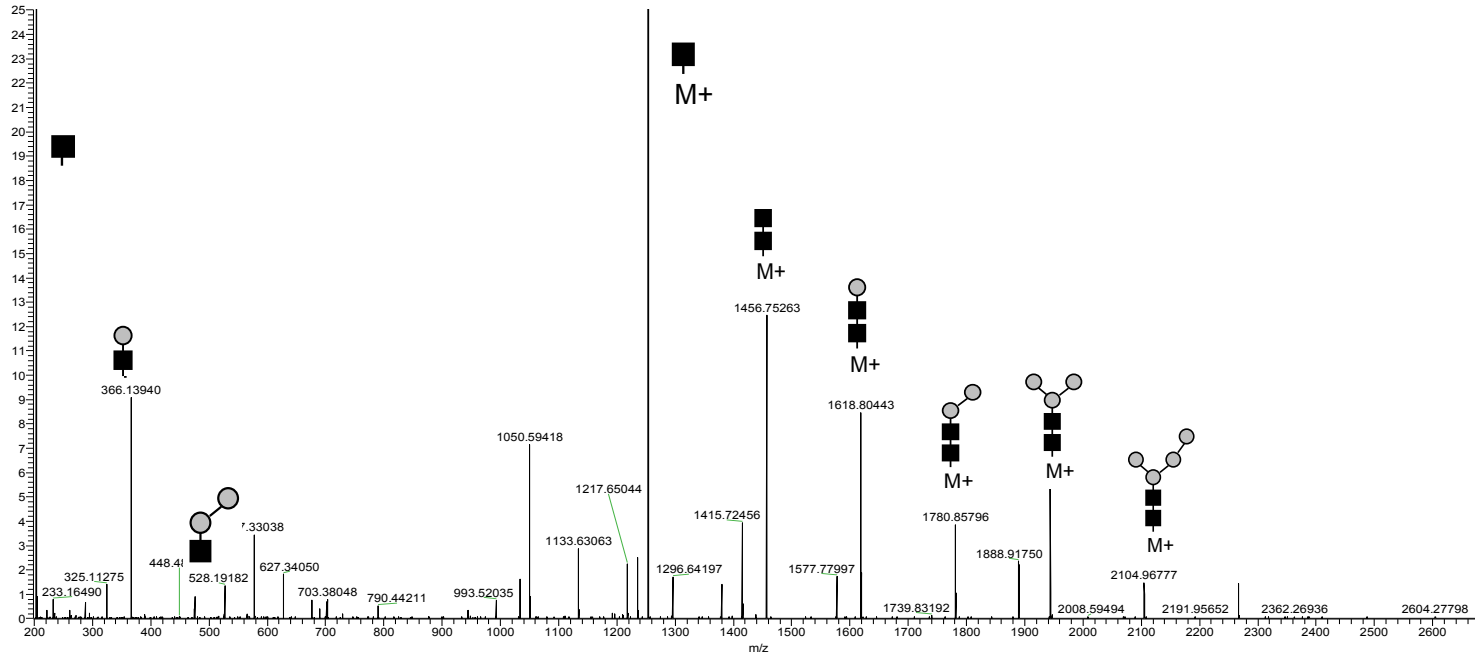

Melanoma B14

Figure S9

161019\_LFN\_All\_glyco #2656-2683 RT: 7.07-7.13 AV: 3 NL: 2.53E6  
F: FTMS + p NSI Full ms2 1377.09@hcd18.00 [200.00-2825.00]

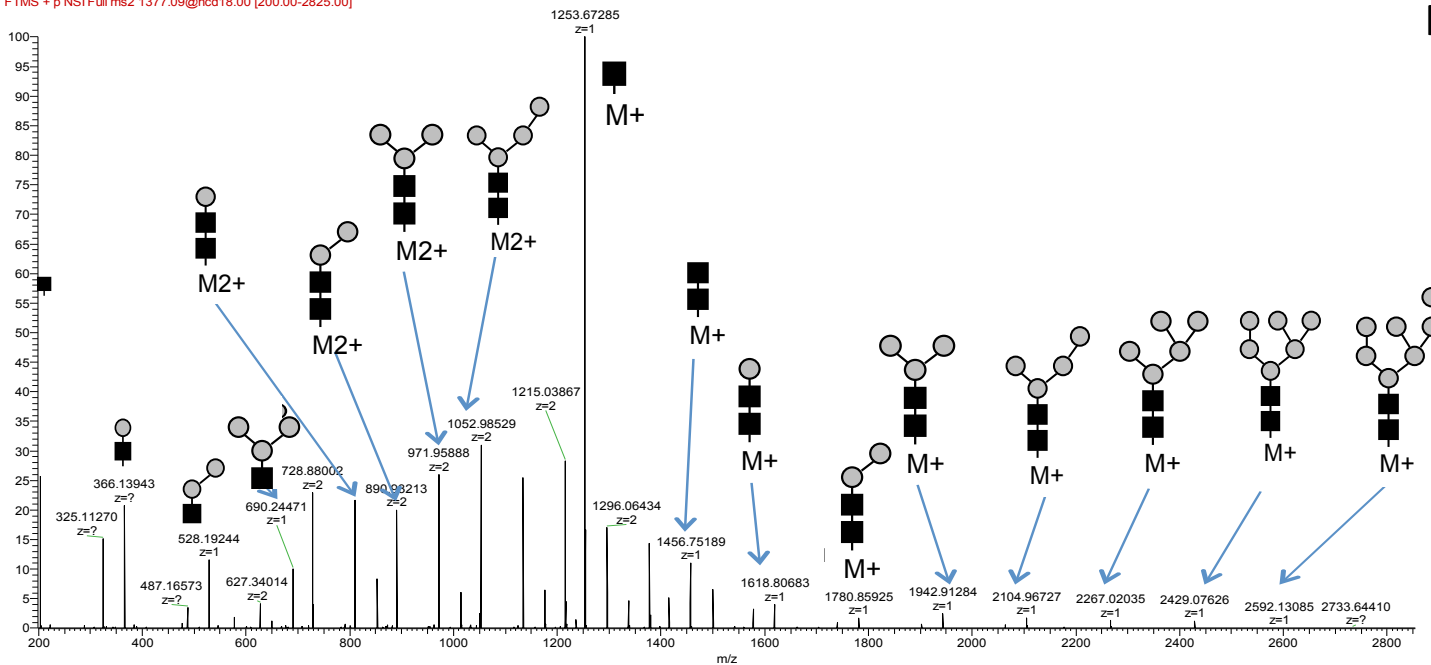

Recomb PD-L1

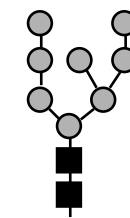

LFNVTSTLR

m/z 1377.0914 (+2)

$\Delta = 2.5$  ppm

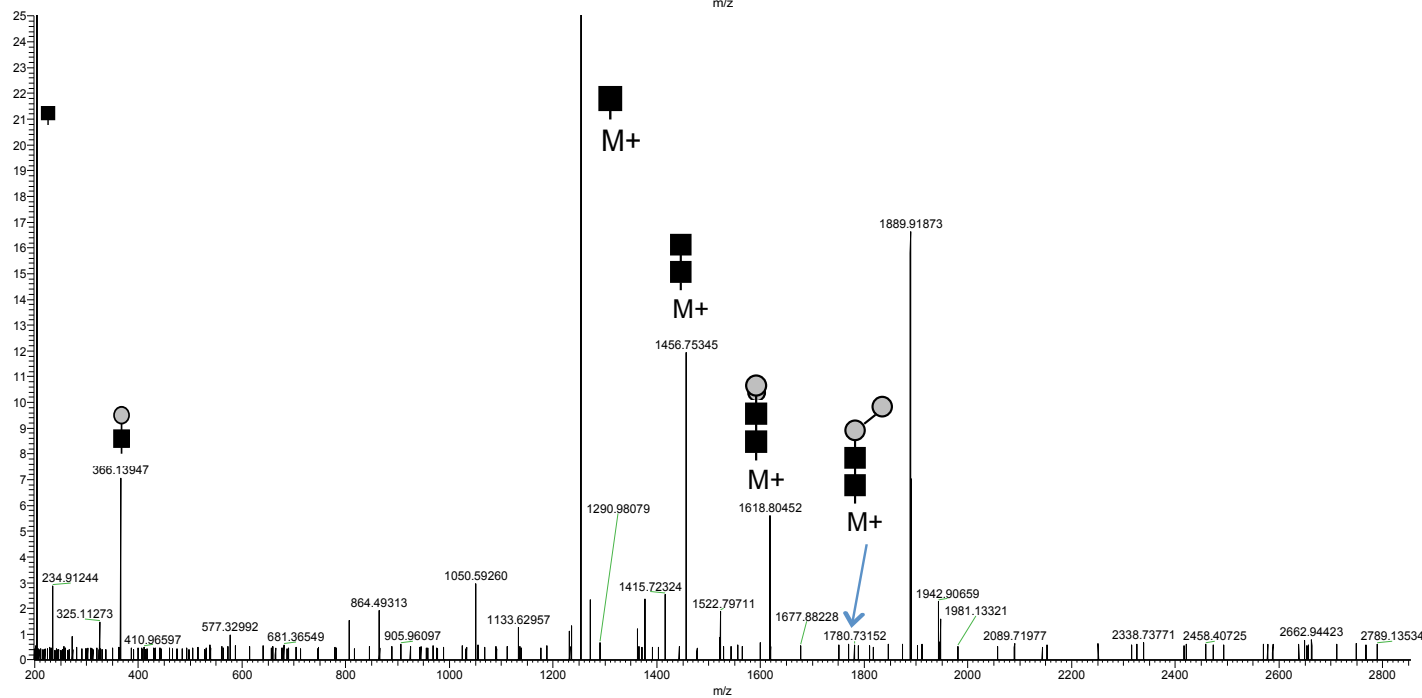

Melanoma B14

Figure S10

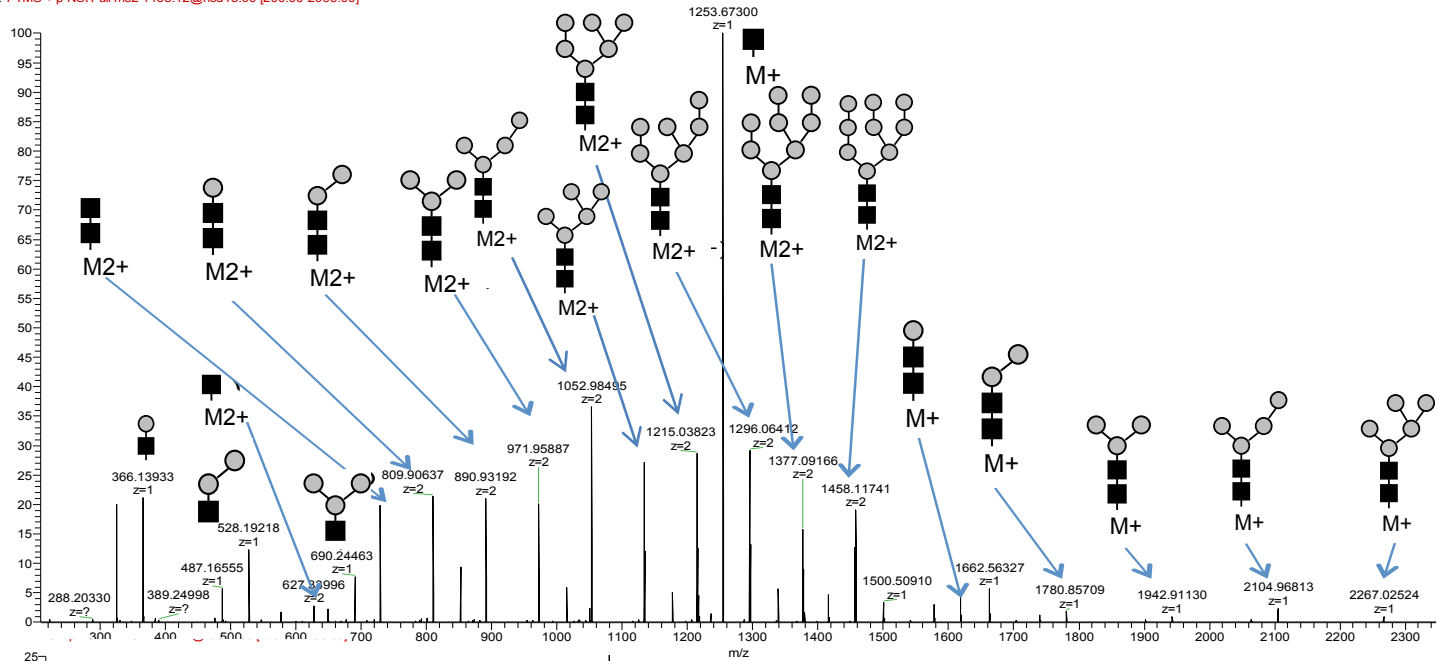

Recomb PD-L1

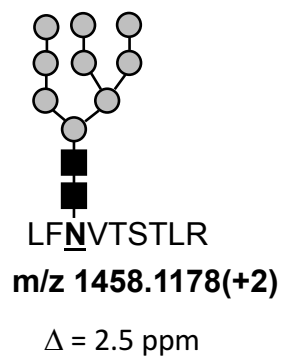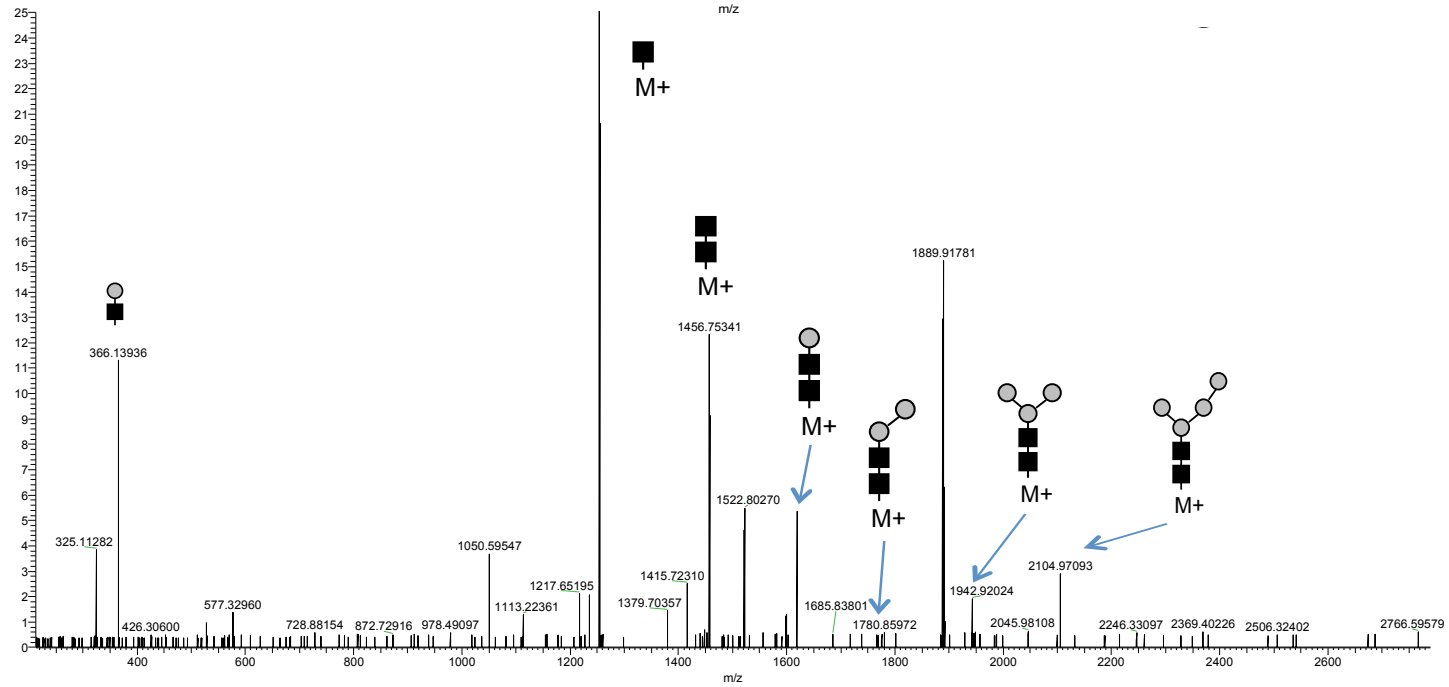

Melanoma B14

Figure S11
